# Supplementary material for: First-line palliative systemic therapy alternated with electrostatic pressurised intraperitoneal aerosol chemotherapy (oxaliplatin) for isolated unresectable colorectal peritoneal metastases: protocol of a multicentre, single-arm, phase II study (CRC-PIPAC-II)
Source: PubMed Central journal article supplement — BMJ Open. 2021 Mar 30;11(3):e044811. doi: 10.1136/bmjopen-2020-044811 (PMC8011718; doi:10.1136/bmjopen-2020-044811), 2021-03-30
Supplement: bmjopen-2020-044811.draft_revisions.pdf [file bmjopen-2020-044811.draft_revisions.pdf]

# BMJ Open

BMJ Open is committed to open peer review. As part of this commitment we make the peer review history of every article we publish publicly available.

When an article is published we post the peer reviewers' comments and the authors' responses online. We also post the versions of the paper that were used during peer review. These are the versions that the peer review comments apply to.

The versions of the paper that follow are the versions that were submitted during the peer review process. They are not the versions of record or the final published versions. They should not be cited or distributed as the published version of this manuscript.

BMJ Open is an open access journal and the full, final, typeset and author-corrected version of record of the manuscript is available on our site with no access controls, subscription charges or pay-per-view fees (<http://bmjopen.bmj.com>).

If you have any questions on BMJ Open's open peer review process please email [info.bmjopen@bmj.com](mailto:info.bmjopen@bmj.com)

# BMJ Open

**First-line palliative systemic therapy alternated with electrostatic pressurized intraperitoneal aerosol chemotherapy (oxaliplatin) for isolated unresectable colorectal peritoneal metastases: protocol of a multicenter, single-arm, phase II study (CRC-PIPAC-II).**

|                               |                                                                                                                                                                                                                                                                                                                                                                                                                                                                                                                                                                                                                                                                                                                                                                                                                                                                                                                                                                                                                                                                                                                                                                                                                                                                                                                      |
|-------------------------------|----------------------------------------------------------------------------------------------------------------------------------------------------------------------------------------------------------------------------------------------------------------------------------------------------------------------------------------------------------------------------------------------------------------------------------------------------------------------------------------------------------------------------------------------------------------------------------------------------------------------------------------------------------------------------------------------------------------------------------------------------------------------------------------------------------------------------------------------------------------------------------------------------------------------------------------------------------------------------------------------------------------------------------------------------------------------------------------------------------------------------------------------------------------------------------------------------------------------------------------------------------------------------------------------------------------------|
| Journal:                      | <i>BMJ Open</i>                                                                                                                                                                                                                                                                                                                                                                                                                                                                                                                                                                                                                                                                                                                                                                                                                                                                                                                                                                                                                                                                                                                                                                                                                                                                                                      |
| Manuscript ID                 | bmjopen-2020-044811                                                                                                                                                                                                                                                                                                                                                                                                                                                                                                                                                                                                                                                                                                                                                                                                                                                                                                                                                                                                                                                                                                                                                                                                                                                                                                  |
| Article Type:                 | Protocol                                                                                                                                                                                                                                                                                                                                                                                                                                                                                                                                                                                                                                                                                                                                                                                                                                                                                                                                                                                                                                                                                                                                                                                                                                                                                                             |
| Date Submitted by the Author: | 14-Sep-2020                                                                                                                                                                                                                                                                                                                                                                                                                                                                                                                                                                                                                                                                                                                                                                                                                                                                                                                                                                                                                                                                                                                                                                                                                                                                                                          |
| Complete List of Authors:     | Lurvink, Robin; Catharina Hospital, Surgery<br>Rauwerdink, Paulien; St. Antonius Hospital, Surgery<br>Rovers, Koen; Catharina Hospital, Surgery<br>Wassenaar, Emma; St. Antonius Hospital, Surgery<br>Deenen, Maarten; Catharina Hospital, Clinical Pharmacy<br>Nederend, Joost; Catharina Hospital, Radiology<br>Huysentruyt, Clément; Catharina Hospital, Pathology<br>van 't Erve, Iris; Netherlands Cancer Institute, Pathology<br>Fijneman, Remond; Netherlands Cancer Institute, Pathology<br>van der Hoeven, Erik; St. Antonius Hospital, Radiology<br>Seldenrijk, Cornelis; St. Antonius Hospital, Pathology<br>DNA<br>Constantinides, Alexander; UMC Utrecht, Imaging and Cancer<br>Kranenburg, Onno; UMC Utrecht, Imaging and Cancer<br>Los, Maartje; St. Antonius Hospital, Medical oncology<br>Herbschleb, Karin ; St. Antonius Hospital, Medical oncology<br>Thijs, Annemarie; Catharina Hospital, Medical Oncology<br>Creemers, Geert-Jan; Catharina Hospital, Medical Oncology<br>Burger, Jacobus; Catharina Hospital, Surgery<br>Wiezer, Marinus; Sint Antonius Hospital, Surgery<br>Nienhuijs, Simon W.; Catharina Hospital, Surgery<br>Boerma, Djamila ; St. Antonius Ziekenhuis, Surgery<br>de Hingh, Ignace; Catharina Hospital, Surgery; GROW, School for<br>Oncology and Developmental Biology |
| Keywords:                     | Colorectal surgery < SURGERY, Gastrointestinal tumours < ONCOLOGY, CHEMOTHERAPY                                                                                                                                                                                                                                                                                                                                                                                                                                                                                                                                                                                                                                                                                                                                                                                                                                                                                                                                                                                                                                                                                                                                                                                                                                      |
|                               |                                                                                                                                                                                                                                                                                                                                                                                                                                                                                                                                                                                                                                                                                                                                                                                                                                                                                                                                                                                                                                                                                                                                                                                                                                                                                                                      |

SCHOLARONE™  
Manuscripts

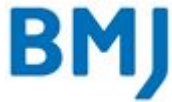

I, the Submitting Author has the right to grant and does grant on behalf of all authors of the Work (as defined in the below author licence), an exclusive licence and/or a non-exclusive licence for contributions from authors who are: i) UK Crown employees; ii) where BMJ has agreed a CC-BY licence shall apply, and/or iii) in accordance with the terms applicable for US Federal Government officers or employees acting as part of their official duties; on a worldwide, perpetual, irrevocable, royalty-free basis to BMJ Publishing Group Ltd ("BMJ") its licensees and where the relevant Journal is co-owned by BMJ to the co-owners of the Journal, to publish the Work in this journal and any other BMJ products and to exploit all rights, as set out in our [licence](#).

The Submitting Author accepts and understands that any supply made under these terms is made by BMJ to the Submitting Author unless you are acting as an employee on behalf of your employer or a postgraduate student of an affiliated institution which is paying any applicable article publishing charge ("APC") for Open Access articles. Where the Submitting Author wishes to make the Work available on an Open Access basis (and intends to pay the relevant APC), the terms of reuse of such Open Access shall be governed by a Creative Commons licence – details of these licences and which [Creative Commons](#) licence will apply to this Work are set out in our licence referred to above.

Other than as permitted in any relevant BMJ Author's Self Archiving Policies, I confirm this Work has not been accepted for publication elsewhere, is not being considered for publication elsewhere and does not duplicate material already published. I confirm all authors consent to publication of this Work and authorise the granting of this licence.

1  
2  
3 1 **Title Page**  
4  
5

6 2 Title  
7  
8

9 3 **First-line palliative systemic therapy alternated with electrostatic pressurized intraperitoneal**  
10  
11 4 **aerosol chemotherapy (oxaliplatin) for isolated unresectable colorectal peritoneal metastases:**  
12  
13 5 **protocol of a multicenter, single-arm, phase II study (CRC-PIPAC-II).**  
14  
15

16 6 Authors  
17  
18

19  
20 7 R.J. Lurvink<sup>1\*</sup>; P. Rauwerdink<sup>2\*</sup>; K.P. Rovers<sup>1</sup>; E.C.E. Wassenaar<sup>2</sup>; M.J. Deenen<sup>3</sup>; J. Nederend<sup>4</sup>; C.J.R.  
21  
22 8 Huysentruyt<sup>5</sup>; I. van 't Erve<sup>6</sup>; R.J.A. Fijneman<sup>6</sup>; E.J.R.J. van der Hoeven<sup>7</sup>; C.A. Seldenrijk<sup>8</sup>; A.  
23  
24 9 Constantinides<sup>9</sup>; O. Kranenburg<sup>9</sup>; M. Los<sup>10</sup>; K.H. Herbschleb<sup>10</sup>; A.M.J. Thijs<sup>11</sup>; G.J.M. Creemers<sup>11</sup>; J.W.A.  
25  
26 10 Burger<sup>1</sup>; M.J. Wiezer<sup>2</sup>; S.W. Nienhuijs<sup>1</sup>; D. Boerma<sup>2</sup>; I.H.J.T. de Hingh<sup>1,12</sup>  
27  
28

29 11 \* Equally contributing first authors.  
30  
31

32 12 Affiliations  
33  
34

35 13 <sup>1</sup>Department of Surgery, Catharina Hospital, Eindhoven, the Netherlands.  
36  
37

38 14 <sup>2</sup>Department of Surgery, St. Antonius Hospital, Nieuwegein, the Netherlands.  
39  
40

41 15 <sup>3</sup>Department of Clinical Pharmacy, Catharina Hospital, Eindhoven, the Netherlands.  
42  
43

44 16 <sup>4</sup>Department of Radiology, Catharina Hospital, Eindhoven, the Netherlands.  
45  
46

47 17 <sup>5</sup>Department of Pathology, Catharina Hospital, Eindhoven, the Netherlands.  
48  
49

50 18 <sup>6</sup>Department of Pathology, Netherlands Cancer Institute, Amsterdam, the Netherlands.  
51  
52

53 19 <sup>7</sup>Department of Radiology, St. Antonius Hospital, Nieuwegein, the Netherlands  
54  
55

56 20 <sup>8</sup>Pathology DNA, location St. Antonius Hospital, Nieuwegein, the Netherlands  
57  
58

59 21 <sup>9</sup>Imaging and Cancer, University Medical Center Utrecht, Utrecht, the Netherlands.  
60

1  
2  
3 1 <sup>10</sup>Department of Medical Oncology, St. Antonius Hospital, Nieuwegein, the Netherlands.  
4  
5

6 2 <sup>11</sup>Department of Medical Oncology, Catharina Hospital, Eindhoven, the Netherlands.  
7  
8

9 3 <sup>12</sup>GROW – School for Oncology and Developmental Biology, Maastricht University, Maastricht, the  
10  
11 4 Netherlands.  
12  
13

14 5 Corresponding author:  
15

16 6 Prof. I.H.J.T. (Ignace) de Hingh, MD, PhD;  
17

18 7 Surgeon, Department of Surgery; Catharina Hospital;  
19

20 8 PO Box 1350, 5602 ZA, Eindhoven, the Netherlands;  
21  
22

23 9 E-mail: [ignace.d.hingh@catharinaziekenhuis.nl](mailto:ignace.d.hingh@catharinaziekenhuis.nl);  
24

25 10 Telephone: +31 40 239 7150.  
26

27 11 Word count: 3224  
28  
29

30 12 Tables: 1  
31  
32

33 13 Figures: 1  
34  
35

36 14 Conflicts of interest: IHJTH received grants, paid to the institute, from Roche, QP&S, and Rand Biotech  
37  
38 15 outside the submitted work. The other authors have no competing interests.  
39

40 16 Protocol version: This manuscript is based on the study protocol version 4.0, 15 June 2020.  
41  
42

43 17 Funding: This study is supported by the Catharina Research Foundation (unrestricted grant, grant  
44  
45 18 number CZE-2020.02) and the St. Antonius Research Foundation (unrestricted grant, local funding  
46  
47 19 number 2019.01).  
48  
49  
50

51 20  
52  
53  
54  
55  
56  
57  
58  
59  
60

## 1 Abstract

2 **Introduction:** Despite its increasing use, first-line palliative systemic therapy alternated with  
3 electrostatic pressurized intraperitoneal aerosol chemotherapy with oxaliplatin (ePIPAC-OX), also  
4 known as first-line bidirectional therapy, has never been prospectively investigated in patients with  
5 colorectal peritoneal metastases (CPM). As a first step to address the present evidence gap, this  
6 study aims to assess the safety, feasibility, anti-tumor activity, patient-reported outcomes, costs, and  
7 systemic pharmacokinetics of first-line bidirectional therapy in patients with isolated unresectable  
8 CPM.

9 **Methods and analysis:** In this single-arm, phase II study in two Dutch tertiary referral centers, 20  
10 patients are enrolled. Key eligibility criteria are a good performance status, pathologically proven  
11 isolated unresectable CPM, no previous palliative systemic therapy for colorectal cancer, no  
12 (neo)adjuvant systemic therapy <6 months prior to enrolment, and no previous PIPAC. Patients  
13 receive three cycles of bidirectional therapy. Each cycle consists of six weeks of first-line palliative  
14 systemic therapy at the medical oncologists' decision (CAPOX-bevacizumab, FOLFOX-bevacizumab,  
15 FOLFIRI-bevacizumab, or FOLFOXIRI-bevacizumab) followed by ePIPAC-OX (92 mg/m<sup>2</sup>) with an  
16 intraoperative bolus of intravenous leucovorin (20 mg/m<sup>2</sup>) and 5-fluorouracil (400 mg/m<sup>2</sup>). Study  
17 treatment ends after the third ePIPAC-OX. The primary outcome is the number of patients with – and  
18 procedures leading to – grade ≥3 adverse events (Common Terminology Criteria for Adverse Events  
19 v5.0) up to four weeks after the last procedure. Key secondary outcomes include the number of  
20 bidirectional cycles in each patient, treatment-related characteristics, grade ≤2 adverse events,  
21 tumor response (histopathological, cytological, radiological, biochemical, macroscopic, ascites),  
22 patient-reported outcomes, systemic pharmacokinetics of oxaliplatin, costs, progression-free  
23 survival, and overall survival.

1  
2  
3  
4  
5  
6  
7  
8  
9  
10  
11  
12  
13  
14  
15  
16  
17  
18  
19  
20  
21  
22  
23  
24  
25  
26  
27  
28  
29  
30  
31  
32  
33  
34  
35  
36  
37  
38  
39  
40  
41  
42  
43  
44  
45  
46  
47  
48  
49  
50  
51  
52  
53  
54  
55  
56  
57  
58  
59  
60

- 1 **Ethics and dissemination:** This study is approved by the Dutch competent authority, a medical ethics
- 2 committee, and the institutional review boards of both study centers. Results will be submitted for
- 3 publication in peer-reviewed medical journals and presented to patients and healthcare
- 4 professionals.
  
- 5 **Trial registration number:** Netherlands Trial Register: NL8303.

For peer review only

## 1 Strengths and limitations of this study

- 2 - This is the first clinical study that prospectively investigates the safety, feasibility, and anti-  
3 tumor activity of first-line palliative systemic chemotherapy with bevacizumab alternated  
4 with pressurized intraperitoneal aerosol chemotherapy (oxaliplatin) for colorectal peritoneal  
5 metastases;
- 6 - The present study includes a homogenous population of patients receiving first-line palliative  
7 treatment, which contrasts the heterogeneous populations in various lines of palliative  
8 treatment included in available studies on PIPAC-OX for colorectal peritoneal metastases;
- 9 - Besides clinical outcomes, the present study also analyzes important other outcomes such as  
10 patient-reported outcomes, costs, and the systemic pharmacokinetics of oxaliplatin;
- 11 - Translational side studies of the present study may open new opportunities for research in  
12 understanding and treating colorectal peritoneal metastases;
- 13 - A potential limitation could be the histopathological heterogeneity within our clinically  
14 homogeneous study population, since the inclusion criteria allow the enrolment of patients  
15 with both colorectal and appendiceal carcinomas, as well as including distinct pathological  
16 features such as signet ring cell carcinomas. This could impede the interpretation of anti-  
17 tumor activity.



## 1 Introduction

2 The peritoneum is a common metastatic site in colorectal cancer and the presence of colorectal  
3 peritoneal metastases (CPM) is characterized by a poor prognosis (1, 2). Most patients with CPM are  
4 treated with palliative intent (3). When treated with systemic therapy, patients with CPM have a  
5 shorter survival than patients with systemic metastases of colorectal cancer (4).

6 Theoretically, intraperitoneal chemotherapy could be an interesting palliative treatment option due  
7 to a favorable peritoneum-plasma concentration ratio (5). However, the use of intraperitoneal  
8 chemotherapy is limited by poor direct tumor penetration, inhomogeneous intraperitoneal drug  
9 distribution, and dose-limiting local toxicity (6, 7). Pressurized intraperitoneal aerosol chemotherapy  
10 (PIPAC) has been developed to overcome these limitations (8-11). PIPAC is a laparoscopic method for  
11 the repetitive intraperitoneal administration of low-dose chemotherapy as a pressurized aerosol,  
12 claiming enhanced tumor penetration, homogeneous intraperitoneal drug distribution, and low  
13 toxicity in preliminary studies (8-11). The first clinical reports have suggested that PIPAC is feasible,  
14 safe, and well tolerated in patients with peritoneal metastases of various primary tumors (12, 13).  
15 Given these results, PIPAC is currently implemented in a rapidly increasing number of centers  
16 worldwide (12, 14). In these centers, patients with CPM are generally treated with PIPAC with  
17 oxaliplatin (92 mg/m<sup>2</sup>) every six to eight weeks, with or without concomitant systemic therapy (14).  
18 Electrostatic precipitation of the aerosol is thought to enhance tissue penetration and is practiced in  
19 several centers (15-17).

20 Previously, a multicenter, single-arm, phase II study (CRC-PIPAC) investigated the safety, feasibility,  
21 anti-tumor activity, patient-reported outcomes (PROs), costs, and pharmacokinetics of repetitive  
22 electrostatic PIPAC with oxaliplatin (ePIPAC-OX) as a palliative monotherapy in 20 patients with  
23 isolated unresectable CPM in any line of palliative treatment (18).

24 Repetitive ePIPAC-OX could also be added to first-line systemic therapy in order to maximize  
25 intraperitoneal tumor response and eliminate systemic micrometastases. The combination of first-

1  
2  
3 1 line systemic therapy (including bevacizumab) and repetitive ePIPAC-OX, hereinafter referred to as  
4  
5 2 first-line bidirectional therapy, is already offered to patients with isolated unresectable CPM in  
6  
7 3 several PIPAC centers worldwide (14).  
8  
9

10 4 Despite its increasing use, the feasibility, safety, and anti-tumor activity of first-line  
11  
12 5 bidirectional therapy have never been prospectively investigated in patients with isolated unresectable  
13  
14 6 CPM in clinical trials with predefined eligibility criteria, interventions, and outcomes. Moreover,  
15  
16 7 nothing is known about PROs and costs of – and the systemic pharmacokinetics of oxaliplatin during –  
17  
18 8 first-line bidirectional therapy in this setting. As a first step to address this evidence gap, the present  
19  
20 9 multicenter, single-arm, phase 2 study (CRC-PIPAC-II) aims to assess the safety, feasibility, anti-tumor  
21  
22 10 activity, PROs, costs, and systemic pharmacokinetics of first-line bidirectional therapy in patients with  
23  
24 11 isolated unresectable CPM.  
25  
26  
27  
28  
29  
30  
31  
32  
33  
34  
35  
36  
37  
38  
39  
40  
41  
42  
43  
44  
45  
46  
47  
48  
49  
50  
51  
52  
53  
54  
55  
56  
57  
58  
59  
60

## 1 **Methods and analysis**

### 2 **Setting**

3 This study is performed in two Dutch tertiary referral centers for the surgical treatment of CPM.

### 4 **Eligibility criteria**

5 Eligibility criteria are:

- 6 -  $\geq 18$  years of age;
- 7 - World Health Organization performance status of 0-1;
- 8 - Histologically or cytologically proven peritoneal metastases of a colorectal or appendiceal  
9 carcinoma;
- 10 - Unresectable disease, based on abdominal CT, laparoscopy, or laparotomy;
- 11 - Adequate organ functions (hemoglobin  $\geq 5.0$  mmol/L, neutrophils  $\geq 1.5 \times 10^9/L$ , platelets  
12  $\geq 100 \times 10^9/L$ , serum creatinine  $< 1.5 \times$  upper limit of normal [ULN], creatinine clearance  
13  $\geq 30$  mL/min, and liver transaminases  $< 5 \times$  ULN);
- 14 - No symptoms of gastrointestinal obstruction;
- 15 - No systemic metastases;
- 16 - No contraindications for the planned systemic therapy or laparoscopy;
- 17 - No previous PIPAC;
- 18 - No previous palliative systemic therapy for colorectal cancer;
- 19 - No (neo)adjuvant systemic therapy for colorectal cancer  $\leq 6$  months prior to enrolment;

### 20 **Interventions and procedures**

21 The study flowchart is shown in *Figure 1*. The schedule of enrolment, interventions, and assessments  
22 is shown in *Table 1*.

23

1  
2  
3 1 All patients receive three cycles of first-line bidirectional therapy. Each cycle consists of six weeks of  
4  
5 2 first-line systemic therapy followed by one ePIPAC-OX. Study treatment ends after the third ePIPAC-  
6  
7 3 OX in all patients.  
8  
9

#### 10 4 First-line palliative systemic therapy

11  
12  
13 5 The treating medical oncologist determines which of the following first-line regimens will be used:  
14  
15

- 16 6 - Two three-weekly cycles of CAPOX-bevacizumab (intravenous [IV] oxaliplatin [130 mg/m<sup>2</sup>  
17  
18 body-surface area (BSA)] on day 1, oral capecitabine [1000 mg/m<sup>2</sup> BSA] twice daily on days  
19  
20 1-14, IV bevacizumab [7.5 mg/kg body weight] on day 1), or;  
21  
22
- 23 9 - Three two-weekly cycles of FOLFOX-bevacizumab (IV oxaliplatin [85 mg/m<sup>2</sup> BSA] on day 1,  
24  
25 10 IV leucovorin [400 mg/m<sup>2</sup> BSA] on day 1, IV bolus/continuous 5-fluorouracil [400/2400  
26  
27 11 mg/m<sup>2</sup> BSA] on days 1-2, IV bevacizumab [5 mg/kg body weight] on day 1), or;  
28  
29
- 30 12 - Three two-weekly cycles of FOLFIRI-bevacizumab (IV irinotecan [180 mg/m<sup>2</sup> BSA] on day 1,  
31  
32 13 IV leucovorin [400 mg/m<sup>2</sup> BSA] on day 1, IV bolus/continuous 5-fluorouracil [400/2400  
33  
34 14 mg/m<sup>2</sup> BSA] on days 1-2, IV bevacizumab [5 mg/kg body weight] on day 1), or;  
35  
36
- 37 15 - Three two-weekly cycles of FOLFOXIRI-bevacizumab (IV oxaliplatin [85 mg/m<sup>2</sup> BSA] on day 1,  
38  
39 16 IV irinotecan [165 mg/m<sup>2</sup> BSA] on day 1, IV leucovorin [400 mg/m<sup>2</sup> BSA] on day 1, IV  
40  
41 17 continuous 5-fluorouracil [2400 mg/m<sup>2</sup> BSA] on days 1-2, IV bevacizumab [5 mg/kg body  
42  
43 18 weight] on day 1).  
44  
45

46 19 These regimens are based on the ESMO guideline for the treatment of metastatic colorectal cancer  
47  
48 20 (19). Dose reductions, switches between allowed regimens, and management of toxicity are left to  
49  
50 21 the discretion of the treating medical oncologist. Dihydropyrimidine dehydrogenase status is  
51  
52 22 assessed by genotyping before the first administration of systemic therapy, and dosages of  
53  
54 23 capecitabine or 5-fluorouracil are modified accordingly (20).  
55  
56  
57

#### 58 24 ePIPAC-OX

59  
60

1  
2  
3 1 The procedure has been extensively described in the protocol of the CRC-PIPAC study (18). In  
4  
5 2 summary, after creating a 12 mmHg pneumoperitoneum with two balloon trocars using an open  
6  
7 3 introduction, an explorative laparoscopy is performed with adhesiolysis if needed to create enough  
8  
9 4 working space. If ePIPAC-OX seems feasible, leucovorin (20 mg/m<sup>2</sup> BSA in 10 minutes) and 5-  
10  
11 5 fluorouracil (400 mg/m<sup>2</sup> BSA in 15 minutes) are administered intravenously, since these drugs are  
12  
13 6 thought to increase the efficacy of oxaliplatin (21, 22). Meanwhile, ascites (or peritoneal lavage using  
14  
15 7 saline if ascites is absent) is evacuated and sent for cytology, the peritoneal cancer index (PCI) and  
16  
17 8 ascites volume are registered (23), and three peritoneal metastases from different intraabdominal  
18  
19 9 areas (if possible) are biopsied and sent for histopathology. Biopsy locations are marked with clips to  
20  
21  
22 10 enable similar biopsies during subsequent procedures.

23  
24  
25  
26 11 Then, after building the PIPAC setup and ensuring a leak-free pneumoperitoneum, oxaliplatin (92  
27  
28 12 mg/m<sup>2</sup> BSA [maximum 184 mg] diluted to a total volume of 150 mL in a 5% dextrose solution) is  
29  
30 13 aerosolized into the peritoneal cavity through a nebulizer (CapnoPen, Capnomed GmbH,  
31  
32 14 Villingendorf, Germany) using an angiographic injector at a maximum pressure of 200 psi and a flow  
33  
34 15 of 30 mL/min, all according to internationally used protocols (14). After formation of the aerosol in 5  
35  
36 16 minutes, it is electrostatically precipitated for another 25 minutes using Ultravision technology (Alesi  
37  
38 17 Surgical, Cardiff, United Kingdom) as described by others (16), as this could enhance tumor  
39  
40 18 penetration of oxaliplatin (15).

41  
42  
43  
44 19 Then, the peritoneal cavity is exsufflated through a closed aerosol waste system, a new  
45  
46 20 pneumoperitoneum is obtained to explore if complications have occurred, instruments are removed,  
47  
48 21 and incisions are closed.

49  
50  
51  
52 22 Postoperatively, patients receive analgesics and anti-emetics according to local protocol. Standard  
53  
54 23 postoperative clinical evaluations are performed a few hours after ePIPAC-OX and on every  
55  
56 24 postoperative day until discharge. Postoperative laboratory tests are only performed if indicated.  
57  
58 25 Patients are intentionally discharged on the day of ePIPAC-OX or on the first postoperative day.  
59  
60

## 1 Evaluations

2 Before each cycle of systemic therapy, patients undergo clinical and biochemical (i.e. tumor markers,  
3 organ functions) evaluation by the treating medical oncologist. Before each ePIPAC-OX, patients  
4 undergo clinical evaluation by the treating surgeon. During and shortly after ePIPAC-OX, patients  
5 undergo macroscopic (i.e. peritoneal cancer index [PCI] (23)), ascites volume), histopathological (i.e.  
6 peritoneal regression grading score [PRGS] of peritoneal biopsies (24,25)) and cytological evaluation.  
7 Radiological evaluation is performed one week before the second ePIPAC-OX and four weeks after  
8 the third ePIPAC-OX (26). Patients are discussed by a multidisciplinary tumor board after the second  
9 and third ePIPAC-OX.

10 After completing six weeks of systemic therapy, the subsequent ePIPAC-OX is planned within one to  
11 four weeks thereafter. After ePIPAC-OX, systemic therapy is restarted one to four weeks  
12 postoperatively. Study treatment is discontinued in case of physician-determined disease  
13 progression, unacceptable toxicity, or physician's or patient's decision to discontinue participation.  
14 Study treatment ends after the third ePIPAC-OX, after which patients receive standard care according  
15 to the Dutch national guideline (27).

## 16 Pharmacokinetic sampling

17 Four mL of whole blood samples are collected in heparin tubes at multiple time points during and  
18 after the first ePIPAC-OX as well as during and after the first cycle of systemic therapy:

- 19 - ePIPAC-OX: at t=0, t=0.5, t=1, t=2, and t=16 hours and t=1 week after intraperitoneal  
20 oxaliplatin injection;
- 21 - CAPOX-bevacizumab: at t=0, t=0.5, t=1, and t=2 hours and t=3 weeks after intravenous  
22 administration of oxaliplatin;
- 23 - FOLFOX-bevacizumab or FOLFOXIRI-bevacizumab: at t=0, t=0.5, t=1, t=2, t=48 hours and t=2  
24 weeks after intravenous administration of oxaliplatin.

1  
2  
3 1 After direct centrifuging, a plasma aliquot is stored at -80°C until analysis. To obtain the free fraction  
4  
5 2 of oxaliplatin, a second 1 mL plasma aliquot is centrifuged through an ultrafiltration membrane and  
6  
7 3 stored at -80°C until analysis. Oxaliplatin concentrations are measured using atomic absorption  
8  
9 4 spectrometry performed on a Thermo Fisher Solaar ICE 3500 graphite-furnace spectrophotometer  
10  
11  
12 5 with Zeeman correction (Thermo Fisher Scientific, Bremen, Germany).  
13  
14

### 15 6 Translational research

16  
17  
18 7 Two 10 mL cell-free DNA BCT tubes (Streck, La Vista, Nebraska, USA) are used to collect 20 mL of  
19  
20 8 whole blood at baseline and before each ePIPAC-OX. Tubes are sent to a central laboratory for  
21  
22 9 isolation and storage (-80°C) of plasma and cell pellet according to the manufacturer's instructions.  
23  
24 10 Collected ascites or peritoneal lavage is centrifuged twice (5 minutes, 420 g, zero break) under sterile  
25  
26 11 conditions. The supernatant is snap frozen and stored (-80°C) until further analysis. The cell pellet is  
27  
28 12 suspended into an organoid culture medium at 4°C for transport and further preparation.  
29  
30  
31

### 32 13 Outcomes

33  
34  
35 14 The primary outcome is the number of patients with – and procedures leading to – grade  $\geq 3$  adverse  
36  
37 15 events according to the Common Terminology Criteria for Adverse Events (CTCAE) v5.0 (primary  
38  
39 16 classification) and Clavien-Dindo (secondary classification) up to four weeks after the last ePIPAC-OX  
40  
41 17 (28, 29).  
42  
43

44 18 Secondary outcomes are:

- 45  
46  
47 19 - The number of completed cycles of bidirectional therapy in each patient and reasons for  
48  
49 20 discontinuation;
- 50  
51 21 - Characteristics of systemic therapy (e.g. administered regimens, number of completed  
52  
53 22 cycles, dose reductions);
- 54  
55 23 - Characteristics of ePIPAC-OX (e.g. intraoperative complications, operating time);  
56  
57  
58  
59  
60

- 1
- 2
- 3 1 - The number of patients with – and procedures leading to – grade  $\leq 2$  adverse events
- 4
- 5 2 according to the CTCAE v5.0 (primary classification) and Clavien-Dindo (secondary
- 6
- 7 3 classification) up to four weeks after the last ePIPAC-OX (28, 29);
- 8
- 9
- 10 4 - Hospital stay, defined as the number of days between ePIPAC-OX and initial discharge;
- 11
- 12 5 - Readmissions, defined as any unplanned hospital admission after initial discharge up to four
- 13
- 14 6 weeks after the last ePIPAC-OX;
- 15
- 16 7 - Radiological tumor response, centrally evaluated by two assessors blinded to clinical
- 17
- 18 8 outcomes, using the Response Evaluation Criteria In Solid Tumors v1.1 and the radiological
- 19
- 20 9 PCI (26) ;
- 21
- 22
- 23 10 - Histopathological tumor response, centrally evaluated by two assessors blinded to clinical
- 24
- 25 11 outcomes, using the four tier PRGS of collected peritoneal biopsies during each ePIPAC-OX
- 26
- 27 12 (24, 25);
- 28
- 29
- 30 13 - Macroscopic tumor response, based on the PCI during each ePIPAC-OX;
- 31
- 32 14 - Ascites response, based on ascites volume during each ePIPAC-OX;
- 33
- 34 15 - Biochemical tumor response, based on carcinoembryonic antigen levels at baseline and
- 35
- 36 16 before each ePIPAC-OX;
- 37
- 38
- 39 17 - Cytological tumor response, based on the presence or absence of malignant cells in ascites
- 40
- 41 18 or peritoneal lavage collected during each ePIPAC-OX;
- 42
- 43 19 - PROs, based on the EQ-5D-5L (30), EORTC QLQ-C30 (31), and EORTC QLQ-CR29 (32)
- 44
- 45 20 questionnaires at baseline, one week before the first ePIPAC-OX, and one and four weeks
- 46
- 47 21 after each ePIPAC-OX;
- 48
- 49
- 50 22 - The bioavailability of oxaliplatin, based on the systemic pharmacokinetics of oxaliplatin
- 51
- 52 23 during and after one intravenous administration, as well as during and after one ePIPAC-OX;
- 53
- 54 24 - Costs, derived from the Dutch cost guideline for healthcare research at the time of analysis,
- 55
- 56 25 based on hospital information systems, case report forms, and the iMTA Productivity cost
- 57
- 58
- 59
- 60



- 1  
2  
3 1 questionnaire (33) and the iMTA Medical consumption questionnaire (34) at baseline and  
4  
5 2 four weeks after each ePIPAC-OX;  
6  
7 3 - Progression-free survival, defined as the time between enrolment and physician-determined  
8  
9 disease progression or death;  
10 4  
11  
12 5 - Overall survival, defined as the time between enrolment and death.  
13  
14

### 15 6 **Sample size**

16  
17  
18 7 Given the absence of data to guide a sample size calculation, the central ethics committee approved  
19  
20 8 a pragmatically determined sample size of 20 patients as a sufficient number to explore the safety,  
21  
22 9 feasibility, and anti-tumor activity of the study treatment, similar to the CRC-PIPAC study (18).  
23  
24 10 Enrolled patients who are unable to receive the first ePIPAC-OX are replaced to enrol a total number  
25  
26 11 of 20 patients who receive at least one cycle of bidirectional therapy.  
27  
28  
29

### 30 12 **Recruitment**

31  
32  
33 13 The first patient was enrolled in February 2020. The investigators expect to complete accrual within a  
34  
35 14 maximum of three years. Strategies for achieving adequate patient accrual are not defined a priori.  
36  
37

### 38 15 **Data collection and data management**

39  
40  
41 16 Outcomes are collected in all patients who complete at least one cycle of bidirectional therapy. All  
42  
43 17 baseline characteristics and outcomes are prospectively collected by a local investigator in each  
44  
45 18 study center using standardized electronic case report forms linked to an ISO 27001 certified central  
46  
47 19 study database (De Research Manager, Deventer, the Netherlands). This ISO 27001 certified system  
48  
49 20 optimizes data quality by standardized data entry, coding, security, and storage.  
50  
51

### 52 21 **Statistical methods**

53  
54  
55 22 Continuous data are presented as a median with (interquartile) range and categorical data are  
56  
57 23 presented as number (percentage). Due to the single-arm design of the present study and the  
58  
59 24 explorative nature of the analyzed outcomes, basic statistical methods are not defined a priori. These  
60

1 methods will be defined before data analysis. Time-to-event variables, such as progression-free and  
2 overall survival, are analyzed and presented using the Kaplan-Meier method.

### 3 **Data monitoring**

4 Interim analyses are performed four weeks after the fifth, fifteenth, thirtieth and forty-fifth  
5 procedure. The study is terminated, or temporarily halted for evaluation and potential adaption of  
6 the study protocol, if more than three CTCAE grade 3 or 4 adverse events occur or more than one  
7 CTCAE grade 5 adverse event occur that are considered directly related to ePIPAC-OX. Adverse  
8 events related to systemic therapy are not included in the stopping rules. If the study is terminated,  
9 enrolled patients do not receive any further ePIPAC-OX. The principal investigators (IHJTH and DB)  
10 have access to the interim results and make the final decision to terminate or continue the study.  
11 Given the long term experience with the study drugs and low expected toxicity from PIPAC (given the  
12 experience from the CRC-PIPAC study), the investigators have agreed that a data monitoring  
13 committee is not indicated for this study.

### 14 **Harms**

15 All serious adverse events (SAEs) or suspected unexpected serious adverse reactions (SUSARs) that  
16 occur from enrolment up to four weeks after the last ePIPAC-OX are reported by local investigators  
17 to the coordinating investigator within 24 hours. The coordinating investigator reports these  
18 SAEs/SUSARs to the central ethics committee within 7 days of first knowledge for lethal or life-  
19 threatening SAEs/SUSARs, and within 15 days for other SAEs/SUSARs.

### 20 **Auditing**

21 Auditing is performed by independent qualified monitors of the study centers. The study is  
22 considered a medium risk study according to the brochure 'Kwaliteitsborging mensgebonden  
23 onderzoek 2.0' by the Dutch Federation of University Medical Centers, meaning that study centers  
24 are audited two to three times per year, depending on enrolment, with 25% auditing of the study

1  
2  
3 1 master file, investigator site files, informed consent forms, eligibility criteria, source data verification,  
4  
5 2 and SAEs/SUSARs.  
6  
7

### 8 **Patient and public involvement**

9

10  
11 4 Patients are not involved in the design, recruitment, and conduct of the study, but will be involved in  
12  
13 5 the dissemination of study results.  
14  
15

### 16 **Ethics and dissemination**

17

#### 18 **Research ethics approval**

19

20  
21  
22  
23 8 The present study is approved by a central ethics committee (MEC-U, Nieuwegein, Netherlands,  
24  
25 9 number R19.087) and the institutional review boards of both study centers.  
26  
27

#### 28 **Protocol amendments**

29

30  
31 11 Important modifications to the study protocol need to be authorized by the central ethics  
32  
33 12 committee. After authorization, these modifications are communicated to the Dutch competent  
34  
35 13 authority, the institutional review boards of both study centers, all investigators, study registries, and  
36  
37 14 patients (if required by the central ethics committee).  
38  
39

#### 40 **Informed consent**

41

42  
43 16 Patients are enrolled by their treating physician and provide written informed consent. Patients are  
44  
45 17 able to give separate consent for participation in translational side studies.  
46  
47

#### 48 **Confidentiality**

49

50  
51 19 Personal data of patients is collected, shared and maintained according to the Dutch law.  
52  
53

#### 54 **Access to data**

55

56  
57 21 All authors have access to the final dataset, without any contractual agreements that limit such access.  
58  
59

#### 60 **Ancillary and post-study care**

1  
2  
3 1 One of the study centers (Catharina Hospital, Eindhoven, the Netherlands) is insured to cover harms  
4  
5 2 caused by study participation in either participating hospital. After stopping study treatment,  
6  
7 3 patients receive further supportive, palliative, or curative intent treatment according to Dutch  
8  
9 4 guideline (27).  
10  
11

#### 12 **Dissemination policy**

13  
14  
15 6 Study results will be personally communicated to participants, submitted for publication in peer-  
16  
17 7 reviewed medical journals, and presented to patients, healthcare professionals, and the public on  
18  
19 8 (inter)national meetings. Authorship eligibility guidelines are not defined a priori. The full study  
20  
21 9 protocol and the Dutch informed consent form are available from the corresponding author. After  
22  
23 10 study completion, the participant-level dataset and statistical code will be available on reasonable  
24  
25 11 request.  
26  
27  
28  
29  
30  
31  
32  
33  
34  
35  
36  
37  
38  
39  
40  
41  
42  
43  
44  
45  
46  
47  
48  
49  
50  
51  
52  
53  
54  
55  
56  
57  
58  
59  
60

## 1 Discussion

2 To the knowledge of the authors, CRC-PIPAC-II is the first study that prospectively investigates the  
3 safety, feasibility, anti-tumor activity, PROs, costs and systemic pharmacokinetics of first-line  
4 bidirectional therapy (i.e. first-line systemic therapy alternated with ePIPAC-OX) in patients with  
5 isolated unresectable CPM.

6 The present study has several strengths. All patients in the present study receive bidirectional  
7 therapy as first-line palliative treatment with standard first-line systemic regimens based on the  
8 ESMO guideline for the treatment of metastatic colorectal cancer (19), which contrasts the  
9 heterogeneous populations included in available studies on (e)PIPAC-OX for CPM. The homogeneity  
10 of the study population may facilitate a comparison between the present study and other first-line  
11 studies in metastatic colorectal cancer. Furthermore, assessment of outcomes such as PROs, costs,  
12 and systemic pharmacokinetics will provide further insight in the tolerability, costs, and  
13 pharmacokinetic profile of first-line bidirectional therapy in this setting. Translational side studies  
14 may open new opportunities for research in understanding and treating CPM. A potential limitation  
15 of the present study could be the histopathological heterogeneity within our clinically homogeneous  
16 study population, since the inclusion criteria allow the enrolment of patients with both colorectal and  
17 appendiceal carcinomas, as well as including distinct pathological features such as signet ring cell  
18 carcinomas. Although this could impede the interpretation of survival outcomes, this is not the major  
19 focus of this study.

20 There are two ongoing dose escalation studies investigating the maximum tolerated dose of  
21 repetitive PIPAC-OX (35, 36). These studies will be actively followed by the investigators to evaluate  
22 whether dose adaption of ePIPAC-OX is required in the present study.

23 Results of several other ongoing single-arm, phase II studies are closely monitored. The first study  
24 primarily assesses the histopathological response of PIPAC with various drugs for peritoneal  
25 metastases of various origins (including PIPAC-OX for CPM), with or without concomitant systemic

1  
2  
3 1 therapy, in 137 patients in any line of palliative treatment (37). The second study assesses the safety  
4  
5 2 of PIPAC with various drugs for peritoneal metastases of various origins (including PIPAC-OX for  
6  
7 3 CPM), with or without concomitant systemic therapy, in 16 patients in a later line of palliative  
8  
9 4 treatment (Clinicaltrials.gov, NCT04329494). The third study assesses progression-free survival of 30  
10  
11 5 patients with CPM receiving PIPAC-OX, with or without concomitant systemic therapy, in any line of  
12  
13 6 palliative treatment (Clinicaltrials.gov, NCT03868228). Results of the previous CRC-PIPAC study, the  
14  
15 7 present CRC-PIPAC-II study, and these ongoing studies may help designing future randomized trials  
16  
17 8 to determine the role of (e)PIPAC-OX in the palliative treatment of patients with isolated  
18  
19 9 unresectable CPM.  
20  
21  
22  
23  
24 10  
25  
26  
27  
28  
29  
30  
31  
32  
33  
34  
35  
36  
37  
38  
39  
40  
41  
42  
43  
44  
45  
46  
47  
48  
49  
50  
51  
52  
53  
54  
55  
56  
57  
58  
59  
60

## 1 **Author Contributions**

2 RL and PR are the coordinating investigators. RL, KR, AT, GC, JB, SN, and IH are the local investigators  
3 of the first study center. PR, EW, KH, ML, MW, and DB are the local investigators of the second study  
4 center. MD is the study pharmacologist supervising the pharmacokinetic analyses. JN and EH are the  
5 study radiologists performing the central radiological review. CH and CS are the study pathologists  
6 performing the central histopathological review. IE and RF are responsible for translational research  
7 on blood. AC and OK are responsible for translational research on ascites and peritoneal lavage. IH is  
8 the principal investigator. RL, PR, DB, and IH made substantial contributions to the conception and  
9 design of the study, drafted the protocol and drafted the manuscript. KR, AT, GC, JB, SN, EW, KH, ML,  
10 MW, MD, JN, EH, CH, CS, IE, RF, AC, and OK made substantial contributions to conception and design  
11 of the study and critically revised the protocol and the manuscript for important intellectual content.  
12 RL, PR, KR, EW, MD, JN, CH, IE, RF, EH, CS, AC, OK, ML, KH, AT, GC, JB, MW, SN, DB and IH gave final  
13 approval of the version to be published and agree to be accountable for all aspects of the work.

14

1  
2  
3 **1 Figures**  
4  
5

6 **2 Figure titles:**  
7  
8

9 **3 Figure 1.** Study flowchart.  
10  
11

12 **4 Figure legends:**  
13  
14

15 **5 Figure 1.** *B* bloods (organ functions and tumor markers); *C* cytology (ascites or peritoneal lavage); *CRS*  
16  
17 cytoreductive surgery; *ePIPAC-OX* electrostatic pressurized intraperitoneal aerosol chemotherapy  
18  
19 with oxaliplatin; *H* histopathology (peritoneal biopsies); *MDT* multidisciplinary tumor board; *HIPEC*  
20  
21 hyperthermic intraperitoneal chemotherapy; *P* pharmacokinetic sampling; *Q* questionnaires (costs  
22  
23 and patient-reported outcomes); *Q\** questionnaires (patient-reported outcomes); *R* radiology  
24  
25 (thoracoabdominal CT, diffusion-weighted MRI peritoneum); *R\** thoracoabdominal CT; *T* translational  
26  
27 research (blood and ascites or peritoneal lavage); *T\** translational research (blood).  
28  
29  
30  
31  
32  
33  
34  
35  
36  
37  
38  
39  
40  
41  
42  
43  
44  
45  
46  
47  
48  
49  
50  
51  
52  
53  
54  
55  
56  
57  
58  
59  
60



## References

1. van der Geest LG, Lam-Boer J, Koopman M, Verhoef C, Elferink MA, de Wilt JH. Nationwide trends in incidence, treatment and survival of colorectal cancer patients with synchronous metastases. *Clin Exp Metastasis*. 2015;32(5):457-65.
2. van Gestel YR, Thomassen I, Lemmens VE, Pruijt JF, van Herk-Sukel MP, Rutten HJ, et al. Metachronous peritoneal carcinomatosis after curative treatment of colorectal cancer. *Eur J Surg Oncol*. 2014;40(8):963-9.
3. Razenberg LG, Lemmens VE, Verwaal VJ, Punt CJ, Tanis PJ, Creemers GJ, et al. Challenging the dogma of colorectal peritoneal metastases as an untreatable condition: Results of a population-based study. *Eur J Cancer*. 2016;65:113-20.
4. Franko J, Shi Q, Meyers JP, Maughan TS, Adams RA, Seymour MT, et al. Prognosis of patients with peritoneal metastatic colorectal cancer given systemic therapy: an analysis of individual patient data from prospective randomised trials from the Analysis and Research in Cancers of the Digestive System (ARCAD) database. *Lancet Oncol*. 2016;17(12):1709-19.
5. Dedrick RL, Myers CE, Bungay PM, DeVita VT, Jr. Pharmacokinetic rationale for peritoneal drug administration in the treatment of ovarian cancer. *Cancer Treat Rep*. 1978;62(1):1-11.
6. Dedrick RL, Flessner MF. Pharmacokinetic problems in peritoneal drug administration: tissue penetration and surface exposure. *J Natl Cancer Inst*. 1997;89(7):480-7.
7. Markman M. Intraperitoneal antineoplastic drug delivery: rationale and results. *Lancet Oncol*. 2003;4(5):277-83.
8. Solass W, Hetzel A, Nadiradze G, Sagynaliev E, Reymond MA. Description of a novel approach for intraperitoneal drug delivery and the related device. *Surg Endosc*. 2012;26(7):1849-55.
9. Solass W, Herbette A, Schwarz T, Hetzel A, Sun JS, Dutreix M, et al. Therapeutic approach of human peritoneal carcinomatosis with Dbait in combination with capnoperitoneum: proof of concept. *Surg Endosc*. 2012;26(3):847-52.
10. Solass W, Kerb R, Murdter T, Giger-Pabst U, Strumberg D, Tempfer C, et al. Intraperitoneal chemotherapy of peritoneal carcinomatosis using pressurized aerosol as an alternative to liquid solution: first evidence for efficacy. *Ann Surg Oncol*. 2014;21(2):553-9.
11. Blanco A, Giger-Pabst U, Solass W, Zieren J, Reymond MA. Renal and hepatic toxicities after pressurized intraperitoneal aerosol chemotherapy (PIPAC). *Ann Surg Oncol*. 2013;20(7):2311-6.
12. Alyami M, Hubner M, Grass F, Bakrin N, Villeneuve L, Laplace N, et al. Pressurised intraperitoneal aerosol chemotherapy: rationale, evidence, and potential indications. *Lancet Oncol*. 2019;20(7):e368-e77.
13. Grass F, Vuagniaux A, Teixeira-Farinha H, Lehmann K, Demartines N, Hubner M. Systematic review of pressurized intraperitoneal aerosol chemotherapy for the treatment of advanced peritoneal carcinomatosis. *Br J Surg*. 2017;104(6):669-78.
14. Nowacki M, Alyami M, Villeneuve L, Mercier F, Hubner M, Willaert W, et al. Multicenter comprehensive methodological and technical analysis of 832 pressurized intraperitoneal aerosol chemotherapy (PIPAC) interventions performed in 349 patients for peritoneal carcinomatosis treatment: An international survey study. *Eur J Surg Oncol*. 2018;44(7):991-6.
15. Kakchekeeva T, Demtroder C, Herath NI, Griffiths D, Torkington J, Solass W, et al. In Vivo Feasibility of Electrostatic Precipitation as an Adjunct to Pressurized Intraperitoneal Aerosol Chemotherapy (ePIPAC). *Ann Surg Oncol*. 2016;23(Suppl 5):592-8.
16. Willaert W, Van de Sande L, Van Daele E, Van De Putte D, Van Nieuwenhove Y, Pattyn P, et al. Safety and preliminary efficacy of electrostatic precipitation during pressurized intraperitoneal aerosol chemotherapy (PIPAC) for unresectable carcinomatosis. *Eur J Surg Oncol*. 2019;45(12):2302-9.
17. Graversen M, Detlefsen S, Ellebaek SB, Frstrup C, Pfeiffer P, Mortensen MB. Pressurized IntraPeritoneal Aerosol Chemotherapy with one minute of electrostatic precipitation (ePIPAC) is

- feasible, but the histological tumor response in peritoneal metastasis is insufficient. *Eur J Surg Oncol.* 2020;46(1):155-9.
18. Rovers KP, Lurvink RJ, Wassenaar EC, Kootstra TJ, Scholten HJ, Tajzai R, et al. Repetitive electrostatic pressurised intraperitoneal aerosol chemotherapy (ePIPAC) with oxaliplatin as a palliative monotherapy for isolated unresectable colorectal peritoneal metastases: protocol of a Dutch, multicentre, open-label, single-arm, phase II study (CRC-PIPAC). *BMJ Open.* 2019;9(7):e030408.
19. Van Cutsem E, Cervantes A, Adam R, Sobrero A, Van Krieken JH, Aderka D, et al. ESMO consensus guidelines for the management of patients with metastatic colorectal cancer. *Ann Oncol.* 2016;27(8):1386-422.
20. Lunenburg C, van der Wouden CH, Nijenhuis M, Crommentuijn-van Rhenen MH, de Boer-Veger NJ, Buunk AM, et al. Dutch Pharmacogenetics Working Group (DPWG) guideline for the gene-drug interaction of DPYD and fluoropyrimidines. *Eur J Hum Genet.* 2020;28(4):508-17.
21. Elias D, Bonnay M, Puizillou JM, Antoun S, Demirdjian S, El OA, et al. Heated intra-operative intraperitoneal oxaliplatin after complete resection of peritoneal carcinomatosis: pharmacokinetics and tissue distribution. *Ann Oncol.* 2002;13(2):267-72.
22. Giacchetti S, Perpoint B, Zidani R, Le Bail N, Faggiuolo R, Focan C, et al. Phase III multicenter randomized trial of oxaliplatin added to chronomodulated fluorouracil-leucovorin as first-line treatment of metastatic colorectal cancer. *J Clin Oncol.* 2000;18(1):136-47.
23. Jacquet P, Sugarbaker PH. Clinical research methodologies in diagnosis and staging of patients with peritoneal carcinomatosis. *Cancer Treat Res.* 1996;82:359-74.
24. Solass W, Sempoux C, Detlefsen S, Carr NJ, Bibeau F. Peritoneal sampling and histological assessment of therapeutic response in peritoneal metastasis: proposal of the Peritoneal Regression Grading Score (PRGS). *Pleura Peritoneum.* 2016;1(2):99-107.
25. Solass W, Sempoux C, Carr NJ, Bibeau F, Neureiter D, Jager T, et al. Reproducibility of the peritoneal regression grading score for assessment of response to therapy in peritoneal metastasis. *Histopathology.* 2019;74(7):1014-24.
26. Eisenhauer EA, Therasse P, Bogaerts J, Schwartz LH, Sargent D, Ford R, et al. New response evaluation criteria in solid tumours: revised RECIST guideline (version 1.1). *Eur J Cancer.* 2009;45(2):228-47.
27. Landelijke werkgroep Gastro Intestinale Tumoren. Richtlijn colorectaal carcinoom. 2014 <https://www.oncoline.nl/colorectaalcarcinoom> (Accessed 01 September 2020).
28. National Cancer Institute. Common Terminology Criteria for Adverse Events (CTCAE) v5.0. 2017. [https://ctep.cancer.gov/protocolDevelopment/electronic\\_applications/docs/CTCAE\\_v5\\_Quick\\_Reference\\_5x7.pdf](https://ctep.cancer.gov/protocolDevelopment/electronic_applications/docs/CTCAE_v5_Quick_Reference_5x7.pdf) (Accessed 01 September 2020).
29. Dindo D, Demartines N, Clavien PA. Classification of surgical complications: a new proposal with evaluation in a cohort of 6336 patients and results of a survey. *Ann Surg* 2004;240:205–13.
30. Herdman M, Gudex C, Lloyd A, Janssen M, Kind P, Parkin D, et al. Development and preliminary testing of the new five-level version of EQ-5D (EQ-5D-5L). *Qual Life Res.* 2011;20(10):1727-36.
31. Aaronson NK, Ahmedzai S, Bergman B, Bullinger M, Cull A, Duez NJ, et al. The European Organization for Research and Treatment of Cancer QLQ-C30: a quality-of-life instrument for use in international clinical trials in oncology. *J Natl Cancer Inst.* 1993;85(5):365-76.
32. Stiggelbout AM, Kunneman M, Baas-Thijssen MC, Neijenhuis PA, Loo AK, Jagers S, et al. The EORTC QLQ-CR29 quality of life questionnaire for colorectal cancer: validation of the Dutch version. *Qual Life Res.* 2016;25(7):1853-8.
33. Bouwmans C, Krol M, Severens H, Koopmanschap M, Brouwer W, Hakkaart-van Roijen L. The iMTA Productivity Cost Questionnaire: A Standardized Instrument for Measuring and Valuing Health-Related Productivity Losses. *Value Health.* 2015;18(6):753-8.
34. iMTA, Productivity, and, Health, Research, Group. Handleiding iMTA Medical Cost Questionnaire (iMCQ). Rotterdam: iMTA, Erasmus Universiteit Rotterdam. 2018.

- 1  
2  
3 35. Dumont F, Senellart H, Pein F, Campion L, Glehen O, Goere D, et al. Phase I/II study of  
4 oxaliplatin dose escalation via a laparoscopic approach using pressurized aerosol intraperitoneal  
5 chemotherapy (PIPOX trial) for nonresectable peritoneal metastases of digestive cancers (stomach,  
6 small bowel and colorectal): Rationale and design. *Pleura Peritoneum*. 2018;3(3):20180120.  
7  
8 36. Kim G, Tan HL, Chen E, Teo SC, Jang CJM, Ho J, et al. Study protocol: phase 1 dose escalating  
9 study of Pressurized Intra-Peritoneal Aerosol Chemotherapy (PIPAC) with oxaliplatin in peritoneal  
10 metastasis. *Pleura Peritoneum*. 2018;3(3):20180118.  
11  
12 37. Graversen M, Detlefsen S, Asmussen J, Mahdi B, Fristrup C, Pfeiffer P, et al. Treatment of  
13 peritoneal carcinomatosis with Pressurized IntraPeritoneal Aerosol Chemotherapy - PIPAC-OPC2.  
14 *Pleura Peritoneum*. 2018;3(2):20180108.  
15  
16  
17  
18  
19  
20  
21  
22  
23  
24  
25  
26  
27  
28  
29  
30  
31  
32  
33  
34  
35  
36  
37  
38  
39  
40  
41  
42  
43  
44  
45  
46  
47  
48  
49  
50  
51  
52  
53  
54  
55  
56  
57  
58  
59  
60

For peer review only

Table 1. Schedule of enrolment, interventions and assessments.

|                                                       | Enrolment | Baseline | First six weeks first-line systemic therapy | First ePIPAC-OX | Second six weeks first-line systemic therapy | Second ePIPAC-OX | Third six weeks first-line systemic therapy | Third ePIPAC-OX | Final evaluation | Follow-up |
|-------------------------------------------------------|-----------|----------|---------------------------------------------|-----------------|----------------------------------------------|------------------|---------------------------------------------|-----------------|------------------|-----------|
| <b>Enrolment</b>                                      |           |          |                                             |                 |                                              |                  |                                             |                 |                  |           |
| Eligibility Screen                                    | X         |          |                                             |                 |                                              |                  |                                             |                 |                  |           |
| Informed consent                                      | X         |          |                                             |                 |                                              |                  |                                             |                 |                  |           |
| <b>Interventions</b>                                  |           |          |                                             |                 |                                              |                  |                                             |                 |                  |           |
| Blood samples (organ functions, tumor markers)        |           | X        | X                                           | X               | X                                            | X                | X                                           | X               | X                |           |
| Thoracoabdominal CT                                   |           | X        |                                             |                 | X (c)                                        |                  |                                             |                 | X                |           |
| Diffusion-weighted MRI peritoneum                     |           | X        |                                             |                 |                                              |                  |                                             |                 | X                |           |
| Collection of ascites or peritoneal lavage            |           |          |                                             | X               |                                              | X                |                                             | X               |                  |           |
| Peritoneal biopsies                                   |           |          |                                             | X               |                                              | X                |                                             | X               |                  |           |
| Questionnaires: Patient reported outcomes             |           | X        | X (a)                                       |                 | X (d)                                        |                  | X (d)                                       |                 | X (d)            |           |
| Questionnaires: Costs                                 |           | X        |                                             |                 | X (e)                                        |                  | X (e)                                       |                 | X (e)            |           |
| Blood samples for pharmacokinetics                    |           |          | X                                           | X               |                                              |                  |                                             |                 |                  |           |
| Translational research (blood)                        |           | X        |                                             | X (b)           |                                              | X (b)            |                                             | X (b)           |                  |           |
| Translational research (ascites or peritoneal lavage) |           |          |                                             | X               |                                              | X                |                                             | X               |                  |           |
| <b>Assessments</b>                                    |           |          |                                             |                 |                                              |                  |                                             |                 |                  |           |
| Baseline characteristics                              |           | X        |                                             |                 |                                              |                  |                                             |                 |                  |           |
| Treatment-related characteristics (systemic therapy)  |           |          | X                                           |                 | X                                            |                  | X                                           |                 |                  |           |
| Treatment-related characteristics (ePIPAC-OX)         |           |          |                                             | X               |                                              | X                |                                             | X               |                  |           |
| Adverse events                                        |           |          | X                                           | X               | X                                            | X                | X                                           | X               | X                |           |
| Hospital stay                                         |           |          |                                             | X               |                                              | X                |                                             | X               |                  |           |
| Readmissions                                          |           |          |                                             |                 | X                                            |                  | X                                           |                 | X                |           |
| Clinical evaluation                                   |           | X        | X                                           | X               | X                                            | X                | X                                           | X               | X                |           |
| Biochemical response                                  |           |          | X                                           | X               | X                                            | X                | X                                           | X               | X                |           |
| Radiological response                                 |           |          |                                             |                 | X (c)                                        |                  |                                             |                 | X                |           |
| Histopathological response                            |           |          |                                             | X               |                                              | X                |                                             | X               |                  |           |
| Cytological response                                  |           |          |                                             | X               |                                              | X                |                                             | X               |                  |           |
| Macroscopic response                                  |           |          |                                             | X               |                                              | X                |                                             | X               |                  |           |
| Ascites response                                      |           |          |                                             | X               |                                              | X                |                                             | X               |                  |           |
| Patient-reported outcomes                             |           | X        | X (a)                                       |                 | X (d)                                        |                  | X (d)                                       |                 | X (d)            |           |
| Costs                                                 |           | X        |                                             |                 | X (e)                                        |                  | X (e)                                       |                 | X (e)            |           |
| Progression-free survival                             |           |          | X                                           | X               | X                                            | X                | X                                           | X               | X                | X         |
| Overall survival                                      |           |          | X                                           | X               | X                                            | X                | X                                           | X               | X                | X         |

CT, Computed tomography; ePIPAC-OX, electrostatic Pressurized Intraperitoneal Aerosol Chemotherapy with oxaliplatin; MRI, Magnetic Resonance Imaging; (a) one week before the first ePIPAC-OX; (b) just before ePIPAC-OX; (c) one week before the second ePIPAC-OX; (d) one and four weeks after ePIPAC-OX; (e) four weeks after ePIPAC-OX.

1  
2  
3  
4  
5  
6  
7  
8  
9  
10  
11  
12  
13  
14  
15  
16  
17  
18  
19  
20  
21  
22  
23  
24  
25  
26  
27  
28  
29  
30  
31  
32  
33  
34  
35  
36  
37  
38  
39  
40  
41  
42  
43  
44  
45  
46  
47  
48  
49  
50  
51  
52  
53  
54  
55  
56  
57  
58  
59  
60

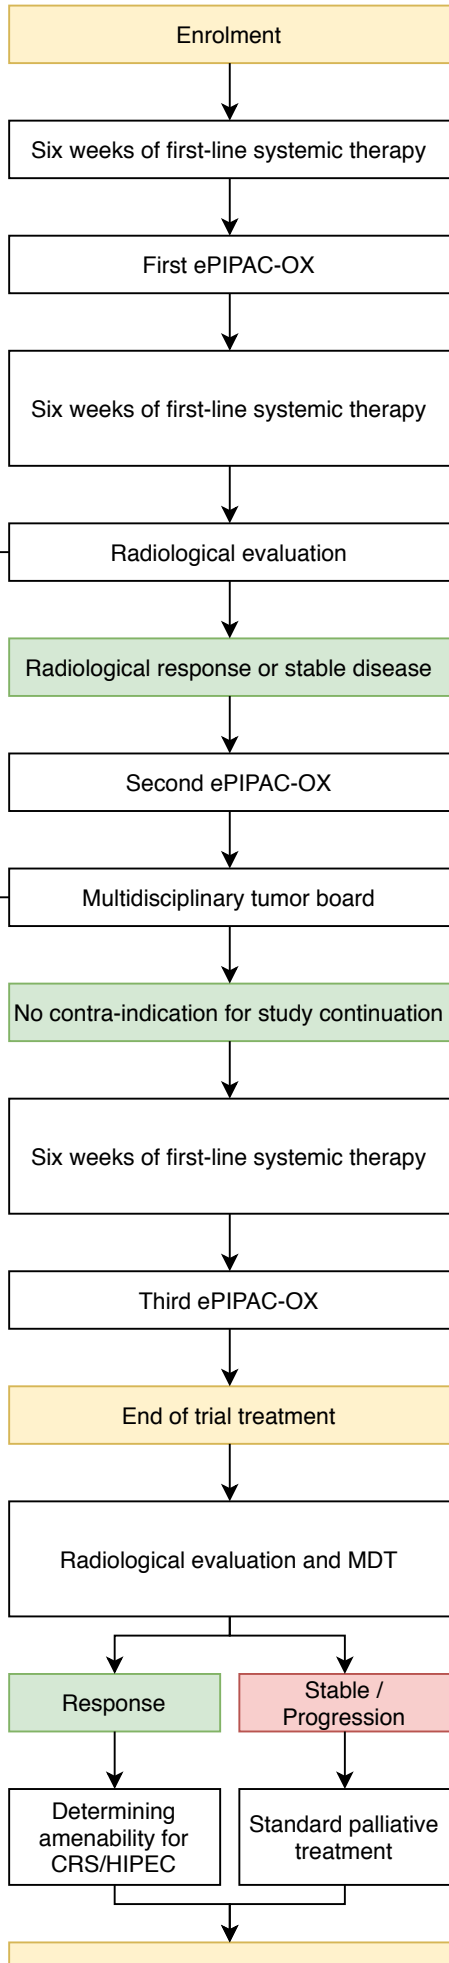

B Q T\* R

B P

B Q\* T C H P

B Q\* Q

R\*

B T C H

B Q\* Q

B T C H

B Q\* Q R

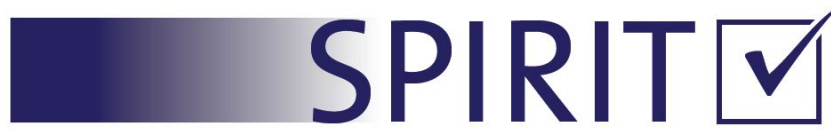

## STANDARD PROTOCOL ITEMS: RECOMMENDATIONS FOR INTERVENTIONAL TRIALS

SPIRIT 2013 Checklist: Recommended items to address in a clinical trial protocol and related documents\*

| Section/item                                              | ItemNo | Description                                                                                                                                                                                                                                                                              | Page and line number(s)                                       |
|-----------------------------------------------------------|--------|------------------------------------------------------------------------------------------------------------------------------------------------------------------------------------------------------------------------------------------------------------------------------------------|---------------------------------------------------------------|
| <b>Administrative information</b>                         |        |                                                                                                                                                                                                                                                                                          |                                                               |
| Title                                                     | 1      | Descriptive title identifying the study design, population, interventions, and, if applicable, trial acronym                                                                                                                                                                             | Page 1, line 3-5                                              |
| Trial registration                                        | 2a     | Trial identifier and registry name. If not yet registered, name of intended registry                                                                                                                                                                                                     | Page 4, line 5                                                |
|                                                           | 2b     | All items from the World Health Organization Trial Registration Data Set                                                                                                                                                                                                                 |                                                               |
| Protocol version                                          | 3      | Date and version identifier                                                                                                                                                                                                                                                              | Page 2, line 16                                               |
| Funding                                                   | 4      | Sources and types of financial, material, and other support                                                                                                                                                                                                                              | Page 2, line 17-19                                            |
| Roles and responsibilities                                | 5a     | Names, affiliations, and roles of protocol contributors                                                                                                                                                                                                                                  | Page 1, line 6-21<br>Page 2, line 1-4<br>Page 20, line 1-13   |
|                                                           | 5b     | Name and contact information for the trial sponsor                                                                                                                                                                                                                                       | Page 2, line 5-10                                             |
|                                                           | 5c     | Role of study sponsor and funders, if any, in study design; collection, management, analysis, and interpretation of data; writing of the report; and the decision to submit the report for publication, including whether they will have ultimate authority over any of these activities | Page 2, line 17-19                                            |
|                                                           | 5d     | Composition, roles, and responsibilities of the coordinating centre, steering committee, endpoint adjudication committee, data management team, and other individuals or groups overseeing the trial, if applicable (see Item 21a for data monitoring committee)                         | Page 20, line 1-13                                            |
| <b>Introduction</b>                                       |        |                                                                                                                                                                                                                                                                                          |                                                               |
| Background and rationale                                  | 6a     | Description of research question and justification for undertaking the trial, including summary of relevant studies (published and unpublished) examining benefits and harms for each intervention                                                                                       | Page 6, line 6-25<br>Page 7, line 1-3                         |
|                                                           | 6b     | Explanation for choice of comparators                                                                                                                                                                                                                                                    | Not applicable                                                |
| Objectives                                                | 7      | Specific objectives or hypotheses                                                                                                                                                                                                                                                        | Page 7, line 4-11                                             |
| Trial design                                              | 8      | Description of trial design including type of trial (eg, parallel group, crossover, factorial, single group), allocation ratio, and framework (eg, superiority, equivalence, noninferiority, exploratory)                                                                                | Page 7, line 8-11                                             |
| <b>Methods: Participants, interventions, and outcomes</b> |        |                                                                                                                                                                                                                                                                                          |                                                               |
| Study setting                                             | 9      | Description of study settings (eg, community clinic, academic hospital) and list of countries where data will be collected. Reference to where list of study sites can be obtained                                                                                                       | Page 8, line 2-3                                              |
| Eligibility criteria                                      | 10     | Inclusion and exclusion criteria for participants. If applicable, eligibility criteria for study centres and individuals who will perform the interventions (eg, surgeons, psychotherapists)                                                                                             | Page 8, line 4-19                                             |
| Interventions                                             | 11a    | Interventions for each group with sufficient detail to allow replication, including how and when they will be administered                                                                                                                                                               | Page 8, line 20-22<br>Page 9, line 1-24<br>Page 10, line 1-25 |
|                                                           | 11b    | Criteria for discontinuing or modifying allocated interventions for a given trial participant (eg, drug dose change in response to harms, participant request, or improving/worsening disease)                                                                                           | Page 9, line 20-23<br>Page 11, line 12-15                     |

|    |                      |     |                                                                                                                                                                                                                                                                                                                                                                                |                                                                |
|----|----------------------|-----|--------------------------------------------------------------------------------------------------------------------------------------------------------------------------------------------------------------------------------------------------------------------------------------------------------------------------------------------------------------------------------|----------------------------------------------------------------|
| 1  |                      | 11c | Strategies to improve adherence to intervention protocols, and any procedures for monitoring adherence (eg, drug tablet return, laboratory tests)                                                                                                                                                                                                                              | Not applicable                                                 |
| 2  |                      |     |                                                                                                                                                                                                                                                                                                                                                                                |                                                                |
| 3  |                      |     |                                                                                                                                                                                                                                                                                                                                                                                |                                                                |
| 4  |                      | 11d | Relevant concomitant care and interventions that are permitted or prohibited during the trial                                                                                                                                                                                                                                                                                  | Not applicable                                                 |
| 5  |                      |     |                                                                                                                                                                                                                                                                                                                                                                                |                                                                |
| 6  | Outcomes             | 12  | Primary, secondary, and other outcomes, including the specific measurement variable (eg, systolic blood pressure), analysis metric (eg, change from baseline, final value, time to event), method of aggregation (eg, median, proportion), and time point for each outcome. Explanation of the clinical relevance of chosen efficacy and harm outcomes is strongly recommended | Page 12, line 13-23<br>Page 13, line 1-25<br>Page 14, line 1-5 |
| 7  |                      |     |                                                                                                                                                                                                                                                                                                                                                                                |                                                                |
| 8  |                      |     |                                                                                                                                                                                                                                                                                                                                                                                |                                                                |
| 9  |                      |     |                                                                                                                                                                                                                                                                                                                                                                                |                                                                |
| 10 | Participant timeline | 13  | Time schedule of enrolment, interventions (including any run-ins and washouts), assessments, and visits for participants. A schematic diagram is highly recommended (see Figure)                                                                                                                                                                                               | Figure 1                                                       |
| 11 |                      |     |                                                                                                                                                                                                                                                                                                                                                                                |                                                                |
| 12 |                      |     |                                                                                                                                                                                                                                                                                                                                                                                |                                                                |
| 13 | Sample size          | 14  | Estimated number of participants needed to achieve study objectives and how it was determined, including clinical and statistical assumptions supporting any sample size calculations                                                                                                                                                                                          | Page 14, line 6-11                                             |
| 14 |                      |     |                                                                                                                                                                                                                                                                                                                                                                                |                                                                |
| 15 |                      |     |                                                                                                                                                                                                                                                                                                                                                                                |                                                                |
| 16 | Recruitment          | 15  | Strategies for achieving adequate participant enrolment to reach target sample size                                                                                                                                                                                                                                                                                            | Page 14, line 12-14                                            |
| 17 |                      |     |                                                                                                                                                                                                                                                                                                                                                                                |                                                                |
| 18 |                      |     |                                                                                                                                                                                                                                                                                                                                                                                |                                                                |

#### Methods: Assignment of interventions (for controlled trials)

##### Allocation:

|    |                                  |     |                                                                                                                                                                                                                                                                                                                                                          |                |
|----|----------------------------------|-----|----------------------------------------------------------------------------------------------------------------------------------------------------------------------------------------------------------------------------------------------------------------------------------------------------------------------------------------------------------|----------------|
| 21 |                                  |     |                                                                                                                                                                                                                                                                                                                                                          |                |
| 22 | Sequence generation              | 16a | Method of generating the allocation sequence (eg, computer-generated random numbers), and list of any factors for stratification. To reduce predictability of a random sequence, details of any planned restriction (eg, blocking) should be provided in a separate document that is unavailable to those who enrol participants or assign interventions | Not applicable |
| 23 |                                  |     |                                                                                                                                                                                                                                                                                                                                                          |                |
| 24 |                                  |     |                                                                                                                                                                                                                                                                                                                                                          |                |
| 25 |                                  |     |                                                                                                                                                                                                                                                                                                                                                          |                |
| 26 |                                  |     |                                                                                                                                                                                                                                                                                                                                                          |                |
| 27 | Allocation concealment mechanism | 16b | Mechanism of implementing the allocation sequence (eg, central telephone; sequentially numbered, opaque, sealed envelopes), describing any steps to conceal the sequence until interventions are assigned                                                                                                                                                | Not applicable |
| 28 |                                  |     |                                                                                                                                                                                                                                                                                                                                                          |                |
| 29 |                                  |     |                                                                                                                                                                                                                                                                                                                                                          |                |
| 30 | Implementation                   | 16c | Who will generate the allocation sequence, who will enrol participants, and who will assign participants to interventions                                                                                                                                                                                                                                | Not applicable |
| 31 |                                  |     |                                                                                                                                                                                                                                                                                                                                                          |                |
| 32 | Blinding (masking)               | 17a | Who will be blinded after assignment to interventions (eg, trial participants, care providers, outcome assessors, data analysts), and how                                                                                                                                                                                                                | Not applicable |
| 33 |                                  |     |                                                                                                                                                                                                                                                                                                                                                          |                |
| 34 |                                  | 17b | If blinded, circumstances under which unblinding is permissible, and procedure for revealing a participant's allocated intervention during the trial                                                                                                                                                                                                     | Not applicable |
| 35 |                                  |     |                                                                                                                                                                                                                                                                                                                                                          |                |
| 36 |                                  |     |                                                                                                                                                                                                                                                                                                                                                          |                |

#### Methods: Data collection, management, and analysis

|    |                         |     |                                                                                                                                                                                                                                                                                                                                                                                                              |                                          |
|----|-------------------------|-----|--------------------------------------------------------------------------------------------------------------------------------------------------------------------------------------------------------------------------------------------------------------------------------------------------------------------------------------------------------------------------------------------------------------|------------------------------------------|
| 37 |                         |     |                                                                                                                                                                                                                                                                                                                                                                                                              |                                          |
| 38 | Data collection methods | 18a | Plans for assessment and collection of outcome, baseline, and other trial data, including any related processes to promote data quality (eg, duplicate measurements, training of assessors) and a description of study instruments (eg, questionnaires, laboratory tests) along with their reliability and validity, if known. Reference to where data collection forms can be found, if not in the protocol | Page 14, line 15-20                      |
| 39 |                         |     |                                                                                                                                                                                                                                                                                                                                                                                                              |                                          |
| 40 |                         | 18b | Plans to promote participant retention and complete follow-up, including list of any outcome data to be collected for participants who discontinue or deviate from intervention protocols                                                                                                                                                                                                                    | Page 14, line 15-20                      |
| 41 |                         |     |                                                                                                                                                                                                                                                                                                                                                                                                              |                                          |
| 42 |                         |     |                                                                                                                                                                                                                                                                                                                                                                                                              |                                          |
| 43 |                         |     |                                                                                                                                                                                                                                                                                                                                                                                                              |                                          |
| 44 | Data management         | 19  | Plans for data entry, coding, security, and storage, including any related processes to promote data quality (eg, double data entry; range checks for data values). Reference to where details of data management procedures can be found, if not in the protocol                                                                                                                                            | Page 14, line 15-20                      |
| 45 |                         |     |                                                                                                                                                                                                                                                                                                                                                                                                              |                                          |
| 46 |                         |     |                                                                                                                                                                                                                                                                                                                                                                                                              |                                          |
| 47 |                         |     |                                                                                                                                                                                                                                                                                                                                                                                                              |                                          |
| 48 | Statistical methods     | 20a | Statistical methods for analysing primary and secondary outcomes. Reference to where other details of the statistical analysis plan can be found, if not in the protocol                                                                                                                                                                                                                                     | Page 14, line 21-24<br>Page 15, line 1-2 |
| 49 |                         |     |                                                                                                                                                                                                                                                                                                                                                                                                              |                                          |
| 50 |                         | 20b | Methods for any additional analyses (eg, subgroup and adjusted analyses)                                                                                                                                                                                                                                                                                                                                     | Page 14, line 21-24<br>Page 15, line 1-2 |
| 51 |                         |     |                                                                                                                                                                                                                                                                                                                                                                                                              |                                          |
| 52 |                         | 20c | Definition of analysis population relating to protocol non-adherence (eg, as randomised analysis), and any statistical methods to handle missing data (eg, multiple imputation)                                                                                                                                                                                                                              | Page 14, line 21-24<br>Page 15, line 1-2 |
| 53 |                         |     |                                                                                                                                                                                                                                                                                                                                                                                                              |                                          |
| 54 |                         |     |                                                                                                                                                                                                                                                                                                                                                                                                              |                                          |
| 55 |                         |     |                                                                                                                                                                                                                                                                                                                                                                                                              |                                          |
| 56 |                         |     |                                                                                                                                                                                                                                                                                                                                                                                                              |                                          |
| 57 |                         |     |                                                                                                                                                                                                                                                                                                                                                                                                              |                                          |
| 58 |                         |     |                                                                                                                                                                                                                                                                                                                                                                                                              |                                          |

#### Methods: Monitoring

|    |                                 |     |                                                                                                                                                                                                                                                                                                                                       |                                       |
|----|---------------------------------|-----|---------------------------------------------------------------------------------------------------------------------------------------------------------------------------------------------------------------------------------------------------------------------------------------------------------------------------------------|---------------------------------------|
| 1  | Data monitoring                 | 21a | Composition of data monitoring committee (DMC); summary of its role and reporting structure; statement of whether it is independent from the sponsor and competing interests; and reference to where further details about its charter can be found, if not in the protocol. Alternatively, an explanation of why a DMC is not needed | Page 15, line 3-11                    |
| 2  |                                 |     |                                                                                                                                                                                                                                                                                                                                       |                                       |
| 3  |                                 |     |                                                                                                                                                                                                                                                                                                                                       |                                       |
| 4  |                                 |     |                                                                                                                                                                                                                                                                                                                                       |                                       |
| 5  |                                 |     |                                                                                                                                                                                                                                                                                                                                       |                                       |
| 6  |                                 | 21b | Description of any interim analyses and stopping guidelines, including who will have access to these interim results and make the final decision to terminate the trial                                                                                                                                                               | Page 15, line 3-11                    |
| 7  |                                 |     |                                                                                                                                                                                                                                                                                                                                       |                                       |
| 8  |                                 |     |                                                                                                                                                                                                                                                                                                                                       |                                       |
| 9  | Harms                           | 22  | Plans for collecting, assessing, reporting, and managing solicited and spontaneously reported adverse events and other unintended effects of trial interventions or trial conduct                                                                                                                                                     | Page 15, line 12-17                   |
| 10 |                                 |     |                                                                                                                                                                                                                                                                                                                                       |                                       |
| 11 |                                 |     |                                                                                                                                                                                                                                                                                                                                       |                                       |
| 12 | Auditing                        | 23  | Frequency and procedures for auditing trial conduct, if any, and whether the process will be independent from investigators and the sponsor                                                                                                                                                                                           | Page 15, line 18-24                   |
| 13 |                                 |     |                                                                                                                                                                                                                                                                                                                                       |                                       |
| 14 |                                 |     |                                                                                                                                                                                                                                                                                                                                       |                                       |
| 15 | <b>Ethics and dissemination</b> |     |                                                                                                                                                                                                                                                                                                                                       |                                       |
| 16 | Research ethics approval        | 24  | Plans for seeking research ethics committee/institutional review board (REC/IRB) approval                                                                                                                                                                                                                                             | Page 16, line 5-7                     |
| 17 |                                 |     |                                                                                                                                                                                                                                                                                                                                       |                                       |
| 18 | Protocol amendments             | 25  | Plans for communicating important protocol modifications (eg, changes to eligibility criteria, outcomes, analyses) to relevant parties (eg, investigators, REC/IRBs, trial participants, trial registries, journals, regulators)                                                                                                      | Page 16, line 8-12                    |
| 19 |                                 |     |                                                                                                                                                                                                                                                                                                                                       |                                       |
| 20 |                                 |     |                                                                                                                                                                                                                                                                                                                                       |                                       |
| 21 | Consent or assent               | 26a | Who will obtain informed consent or assent from potential trial participants or authorised surrogates, and how (see Item 32)                                                                                                                                                                                                          | Page 16, line 13-15                   |
| 22 |                                 |     |                                                                                                                                                                                                                                                                                                                                       |                                       |
| 23 |                                 |     |                                                                                                                                                                                                                                                                                                                                       |                                       |
| 24 |                                 | 26b | Additional consent provisions for collection and use of participant data and biological specimens in ancillary studies, if applicable                                                                                                                                                                                                 | Page 16, line 13-15                   |
| 25 |                                 |     |                                                                                                                                                                                                                                                                                                                                       |                                       |
| 26 | Confidentiality                 | 27  | How personal information about potential and enrolled participants will be collected, shared, and maintained in order to protect confidentiality before, during, and after the trial                                                                                                                                                  | Page 16, line 16-17                   |
| 27 |                                 |     |                                                                                                                                                                                                                                                                                                                                       |                                       |
| 28 |                                 |     |                                                                                                                                                                                                                                                                                                                                       |                                       |
| 29 | Declaration of interests        | 28  | Financial and other competing interests for principal investigators for the overall trial and each study site                                                                                                                                                                                                                         | Page 2, line 14-15                    |
| 30 |                                 |     |                                                                                                                                                                                                                                                                                                                                       |                                       |
| 31 | Access to data                  | 29  | Statement of who will have access to the final trial dataset, and disclosure of contractual agreements that limit such access for investigators                                                                                                                                                                                       | Page 16, line 18-19                   |
| 32 |                                 |     |                                                                                                                                                                                                                                                                                                                                       |                                       |
| 33 | Ancillary and post-trial care   | 30  | Provisions, if any, for ancillary and post-trial care, and for compensation to those who suffer harm from trial participation                                                                                                                                                                                                         | Page 16, line 20<br>Page 17, line 1-3 |
| 34 |                                 |     |                                                                                                                                                                                                                                                                                                                                       |                                       |
| 35 | Dissemination policy            | 31a | Plans for investigators and sponsor to communicate trial results to participants, healthcare professionals, the public, and other relevant groups (eg, via publication, reporting in results databases, or other data sharing arrangements), including any publication restrictions                                                   | Page 17, line 4-10                    |
| 36 |                                 |     |                                                                                                                                                                                                                                                                                                                                       |                                       |
| 37 |                                 |     |                                                                                                                                                                                                                                                                                                                                       |                                       |
| 38 |                                 |     |                                                                                                                                                                                                                                                                                                                                       |                                       |
| 39 |                                 | 31b | Authorship eligibility guidelines and any intended use of professional writers                                                                                                                                                                                                                                                        | Page 17, line 7                       |
| 40 |                                 |     |                                                                                                                                                                                                                                                                                                                                       |                                       |
| 41 |                                 | 31c | Plans, if any, for granting public access to the full protocol, participant-level dataset, and statistical code                                                                                                                                                                                                                       | Page 17, line 8-10                    |
| 42 |                                 |     |                                                                                                                                                                                                                                                                                                                                       |                                       |
| 43 |                                 |     |                                                                                                                                                                                                                                                                                                                                       |                                       |
| 44 | <b>Appendices</b>               |     |                                                                                                                                                                                                                                                                                                                                       |                                       |
| 45 | Informed consent materials      | 32  | Model consent form and other related documentation given to participants and authorised surrogates                                                                                                                                                                                                                                    | Not applicable                        |
| 46 |                                 |     |                                                                                                                                                                                                                                                                                                                                       |                                       |
| 47 | Biological specimens            | 33  | Plans for collection, laboratory evaluation, and storage of biological specimens for genetic or molecular analysis in the current trial and for future use in ancillary studies, if applicable                                                                                                                                        | Not applicable                        |
| 48 |                                 |     |                                                                                                                                                                                                                                                                                                                                       |                                       |
| 49 |                                 |     |                                                                                                                                                                                                                                                                                                                                       |                                       |
| 50 |                                 |     |                                                                                                                                                                                                                                                                                                                                       |                                       |

\*It is strongly recommended that this checklist be read in conjunction with the SPIRIT 2013 Explanation & Elaboration for important clarification on the items. Amendments to the protocol should be tracked and dated. The SPIRIT checklist is copyrighted by the SPIRIT Group under the Creative Commons "[Attribution-NonCommercial-NoDerivs 3.0 Unported](https://creativecommons.org/licenses/by-nc-nd/3.0/)" license.



# BMJ Open

**First-line palliative systemic therapy alternated with electrostatic pressurized intraperitoneal aerosol chemotherapy (oxaliplatin) for isolated unresectable colorectal peritoneal metastases: protocol of a multicenter, single-arm, phase II study (CRC-PIPAC-II).**

|                                 |                                                                                                                                                                                                                                                                                                                                                                                                                                                                                                                                                                                                                                                                                                                                                                                                                                                                                                                                                                                                                                                                                                                                                                                                                                                                                                                                      |
|---------------------------------|--------------------------------------------------------------------------------------------------------------------------------------------------------------------------------------------------------------------------------------------------------------------------------------------------------------------------------------------------------------------------------------------------------------------------------------------------------------------------------------------------------------------------------------------------------------------------------------------------------------------------------------------------------------------------------------------------------------------------------------------------------------------------------------------------------------------------------------------------------------------------------------------------------------------------------------------------------------------------------------------------------------------------------------------------------------------------------------------------------------------------------------------------------------------------------------------------------------------------------------------------------------------------------------------------------------------------------------|
| Journal:                        | <i>BMJ Open</i>                                                                                                                                                                                                                                                                                                                                                                                                                                                                                                                                                                                                                                                                                                                                                                                                                                                                                                                                                                                                                                                                                                                                                                                                                                                                                                                      |
| Manuscript ID                   | bmjopen-2020-044811.R1                                                                                                                                                                                                                                                                                                                                                                                                                                                                                                                                                                                                                                                                                                                                                                                                                                                                                                                                                                                                                                                                                                                                                                                                                                                                                                               |
| Article Type:                   | Protocol                                                                                                                                                                                                                                                                                                                                                                                                                                                                                                                                                                                                                                                                                                                                                                                                                                                                                                                                                                                                                                                                                                                                                                                                                                                                                                                             |
| Date Submitted by the Author:   | 30-Jan-2021                                                                                                                                                                                                                                                                                                                                                                                                                                                                                                                                                                                                                                                                                                                                                                                                                                                                                                                                                                                                                                                                                                                                                                                                                                                                                                                          |
| Complete List of Authors:       | Lurvink, Robin; Catharina Hospital, Surgery<br>Rauwerdink, Paulien; Sint Antonius Ziekenhuis, Surgery<br>Rovers, Koen; Catharina Hospital, Surgery<br>Wassenaar, Emma; Sint Antonius Ziekenhuis, Surgery<br>Deenen, Maarten; Catharina Hospital, Clinical Pharmacy<br>Nederend, Joost; Catharina Hospital, Radiology<br>Huysentruyt, Clément; Catharina Hospital, Pathology<br>van 't Erve, Iris; Netherlands Cancer Institute, Pathology<br>Fijneman, Remond; Netherlands Cancer Institute, Pathology<br>van der Hoeven, Erik; Sint Antonius Ziekenhuis, Radiology<br>Seldenrijk, Cornelis; Sint Antonius Ziekenhuis, Pathology<br>DNA Constantinides, Alexander; UMC Utrecht, Imaging and Cancer<br>Kranenburg, Onno; UMC Utrecht, Imaging and Cancer<br>Los, Maartje; Sint Antonius Ziekenhuis, Medical oncology<br>Herbschleb, Karin ; Sint Antonius Ziekenhuis, Medical oncology<br>Thijs, Annemarie; Catharina Hospital, Medical Oncology<br>Creemers, Geert-Jan; Catharina Hospital, Medical Oncology<br>Burger, Jacobus; Catharina Hospital, Surgery<br>Wiezer, Marinus; Sint Antonius Hospital, Surgery<br>Nienhuijs, Simon W.; Catharina Hospital, Surgery<br>Boerma, Djamila ; Sint Antonius Ziekenhuis, Surgery<br>de Hingh, Ignace; Catharina Hospital, Surgery; GROW, School for<br>Oncology and Developmental Biology |
| <b>Primary Subject Heading</b>: | Oncology                                                                                                                                                                                                                                                                                                                                                                                                                                                                                                                                                                                                                                                                                                                                                                                                                                                                                                                                                                                                                                                                                                                                                                                                                                                                                                                             |
| Secondary Subject Heading:      | Surgery, Palliative care, Gastroenterology and hepatology                                                                                                                                                                                                                                                                                                                                                                                                                                                                                                                                                                                                                                                                                                                                                                                                                                                                                                                                                                                                                                                                                                                                                                                                                                                                            |
| Keywords:                       | Colorectal surgery < SURGERY, Gastrointestinal tumours < ONCOLOGY, CHEMOTHERAPY                                                                                                                                                                                                                                                                                                                                                                                                                                                                                                                                                                                                                                                                                                                                                                                                                                                                                                                                                                                                                                                                                                                                                                                                                                                      |
|                                 |                                                                                                                                                                                                                                                                                                                                                                                                                                                                                                                                                                                                                                                                                                                                                                                                                                                                                                                                                                                                                                                                                                                                                                                                                                                                                                                                      |

1  
2  
3  
4  
5  
6  
7  
8  
9  
10  
11  
12  
13  
14  
15  
16  
17  
18  
19  
20  
21  
22  
23  
24  
25  
26  
27  
28  
29  
30  
31  
32  
33  
34  
35  
36  
37  
38  
39  
40  
41  
42  
43  
44  
45  
46  
47  
48  
49  
50  
51  
52  
53  
54  
55  
56  
57  
58  
59  
60

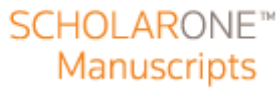

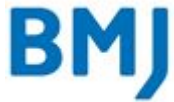

I, the Submitting Author has the right to grant and does grant on behalf of all authors of the Work (as defined in the below author licence), an exclusive licence and/or a non-exclusive licence for contributions from authors who are: i) UK Crown employees; ii) where BMJ has agreed a CC-BY licence shall apply, and/or iii) in accordance with the terms applicable for US Federal Government officers or employees acting as part of their official duties; on a worldwide, perpetual, irrevocable, royalty-free basis to BMJ Publishing Group Ltd ("BMJ") its licensees and where the relevant Journal is co-owned by BMJ to the co-owners of the Journal, to publish the Work in this journal and any other BMJ products and to exploit all rights, as set out in our [licence](#).

The Submitting Author accepts and understands that any supply made under these terms is made by BMJ to the Submitting Author unless you are acting as an employee on behalf of your employer or a postgraduate student of an affiliated institution which is paying any applicable article publishing charge ("APC") for Open Access articles. Where the Submitting Author wishes to make the Work available on an Open Access basis (and intends to pay the relevant APC), the terms of reuse of such Open Access shall be governed by a Creative Commons licence – details of these licences and which [Creative Commons](#) licence will apply to this Work are set out in our licence referred to above.

Other than as permitted in any relevant BMJ Author's Self Archiving Policies, I confirm this Work has not been accepted for publication elsewhere, is not being considered for publication elsewhere and does not duplicate material already published. I confirm all authors consent to publication of this Work and authorise the granting of this licence.

1  
2  
3 **1 Title Page**  
4  
5

6 **2 Title**  
7  
8

9 **3 First-line palliative systemic therapy alternated with electrostatic pressurized intraperitoneal aerosol**  
10 **4 chemotherapy (oxaliplatin) for isolated unresectable colorectal peritoneal metastases: protocol of a**  
11 **5 multicenter, single-arm, phase II study (CRC-PIPAC-II).**  
12  
13  
14  
15

16 **6 Authors**  
17  
18

19 7 R.J. Lurvink<sup>1\*</sup>; P. Rauwerdink<sup>2\*</sup>; K.P. Rovers<sup>1</sup>; E.C.E. Wassenaar<sup>2</sup>; M.J. Deenen<sup>3</sup>; J. Nederend<sup>4</sup>; C.J.R.  
20 8 Huysentruyt<sup>5</sup>; I. van 't Erve<sup>6</sup>; R.J.A. Fijneman<sup>6</sup>; E.J.R.J. van der Hoeven<sup>7</sup>; C.A. Seldenrijk<sup>8</sup>; A.  
21 9 Constantinides<sup>9</sup>; O. Kranenburg<sup>9</sup>; M. Los<sup>10</sup>; K.H. Herbschleb<sup>10</sup>; A.M.J. Thijs<sup>11</sup>; G.J.M. Creemers<sup>11</sup>; J.W.A.  
22 10 Burger<sup>1</sup>; M.J. Wiezer<sup>2</sup>; S.W. Nienhuijs<sup>1</sup>; D. Boerma<sup>2</sup>; I.H.J.T. de Hingh<sup>1,12</sup>  
23  
24  
25  
26  
27  
28

29 11 \* Equally contributing first authors.  
30  
31

32 **12 Affiliations**  
33  
34

35 13 <sup>1</sup>Department of Surgery, Catharina Hospital, Eindhoven, the Netherlands.  
36  
37

38 14 <sup>2</sup>Department of Surgery, St. Antonius Hospital, Nieuwegein, the Netherlands.  
39  
40

41 15 <sup>3</sup>Department of Clinical Pharmacy, Catharina Hospital, Eindhoven, the Netherlands.  
42  
43

44 16 <sup>4</sup>Department of Radiology, Catharina Hospital, Eindhoven, the Netherlands.  
45  
46

47 17 <sup>5</sup>Department of Pathology, Catharina Hospital, Eindhoven, the Netherlands.  
48  
49

50 18 <sup>6</sup>Department of Pathology, Netherlands Cancer Institute, Amsterdam, the Netherlands.  
51  
52

53 19 <sup>7</sup>Department of Radiology, St. Antonius Hospital, Nieuwegein, the Netherlands  
54  
55

56 20 <sup>8</sup>Pathology DNA, location St. Antonius Hospital, Nieuwegein, the Netherlands  
57  
58

59 21 <sup>9</sup>Imaging and Cancer, University Medical Center Utrecht, Utrecht, the Netherlands.  
60  
61

62 22 <sup>10</sup>Department of Medical Oncology, St. Antonius Hospital, Nieuwegein, the Netherlands.  
63

1  
2  
3 1 <sup>11</sup>Department of Medical Oncology, Catharina Hospital, Eindhoven, the Netherlands.

4  
5 2 <sup>12</sup>GROW – School for Oncology and Developmental Biology, Maastricht University, Maastricht, the  
6  
7  
8 3 Netherlands.

9  
10  
11 4 Corresponding author:

12  
13 5 Prof. I.H.J.T. (Ignace) de Hingh, MD, PhD;  
14  
15 6 Surgeon, Department of Surgery; Catharina Hospital;  
16  
17 7 PO Box 1350, 5602 ZA, Eindhoven, the Netherlands;  
18  
19 8 E-mail: [ignace.d.hingh@catharinaziekenhuis.nl](mailto:ignace.d.hingh@catharinaziekenhuis.nl);  
20  
21  
22 9 Telephone: +31 40 239 7150.

23  
24 10 Word count: 3581

25  
26  
27 11 Tables: 1

28  
29  
30 12 Figures: 1

31  
32  
33 13 Conflicts of interest: IHJTH received grants, paid to the institute, from Roche, QP&S, and RanD Biotech  
34  
35 14 outside the submitted work. The other authors have no competing interests.

36  
37 15 Protocol version: This manuscript is based on the study protocol version 4.0, 15 June 2020.

38  
39  
40 16 Funding: This study is supported by the Catharina Research Foundation (unrestricted grant, grant  
41  
42 17 number CZE-2020.02) and the St. Antonius Research Foundation (unrestricted grant, local funding  
43  
44 18 number 2019.01).

45  
46  
47  
48 19  
49  
50  
51  
52  
53  
54  
55  
56  
57  
58  
59  
60

## 1 Abstract

2 **Introduction:** Despite its increasing use, first-line palliative systemic therapy alternated with  
3 electrostatic pressurized intraperitoneal aerosol chemotherapy with oxaliplatin (ePIPAC-OX),  
4 hereinafter referred to as first-line bidirectional therapy, has never been prospectively investigated in  
5 patients with colorectal peritoneal metastases (CPM). As a first step to address this evidence gap, the  
6 present study aims to assess the safety, feasibility, anti-tumor activity, patient-reported outcomes,  
7 costs, and systemic pharmacokinetics of first-line bidirectional therapy in patients with isolated  
8 unresectable CPM.

9 **Methods and analysis:** In this single-arm, phase II study in two Dutch tertiary referral centers, 20  
10 patients are enrolled. Key eligibility criteria are a good performance status, pathologically proven  
11 isolated unresectable CPM, no previous palliative systemic therapy for colorectal cancer, no  
12 (neo)adjuvant systemic therapy  $\leq 6$  months prior to enrolment, and no previous PIPAC. Patients receive  
13 three cycles of bidirectional therapy. Each cycle consists of six weeks first-line palliative systemic  
14 therapy at the medical oncologists' decision (CAPOX-bevacizumab, FOLFOX-bevacizumab, FOLFIRI-  
15 bevacizumab, or FOLFOXIRI-bevacizumab) followed by ePIPAC-OX ( $92 \text{ mg/m}^2$ ) with an intraoperative  
16 bolus of intravenous leucovorin ( $20 \text{ mg/m}^2$ ) and 5-fluorouracil ( $400 \text{ mg/m}^2$ ). Study treatment ends  
17 after the third ePIPAC-OX. The primary outcome is the number of patients with – and procedures  
18 leading to – grade  $\geq 3$  adverse events (Common Terminology Criteria for Adverse Events v5.0) up to four  
19 weeks after the last procedure. Key secondary outcomes include the number of bidirectional cycles in  
20 each patient, treatment-related characteristics, grade  $\leq 2$  adverse events, tumor response  
21 (histopathological, cytological, radiological, biochemical, macroscopic, ascites), patient-reported  
22 outcomes, systemic pharmacokinetics of oxaliplatin, costs, progression-free survival, and overall  
23 survival.

- 1  
2  
3 1 **Ethics and dissemination:** This study is approved by the Dutch competent authority, a medical ethics  
4  
5 2 committee, and the institutional review boards of both study centers. Results will be submitted for  
6  
7 3 publication in peer-reviewed medical journals and presented to patients and healthcare professionals.  
8  
9  
10 4 **Trial registration number:** Netherlands Trial Register: NL8303.  
11  
12  
13  
14  
15  
16  
17  
18  
19  
20  
21  
22  
23  
24  
25  
26  
27  
28  
29  
30  
31  
32  
33  
34  
35  
36  
37  
38  
39  
40  
41  
42  
43  
44  
45  
46  
47  
48  
49  
50  
51  
52  
53  
54  
55  
56  
57  
58  
59  
60

For peer review only

## 1 **Strengths and limitations of this study**

- 2 - First prospective phase-II study assessing the safety, feasibility, and anti-tumor activity of first-
- 3 line palliative systemic therapy with bevacizumab alternated with PIPAC (oxaliplatin) for
- 4 colorectal peritoneal metastases (CPM);
- 5 - Inclusion of a clinically homogenous population of CPM patients receiving first-line palliative
- 6 treatment;
- 7 - Assessment of multiple secondary outcomes, e.g. patient-reported outcomes, costs, and the
- 8 systemic pharmacokinetics of oxaliplatin;
- 9 - Translational side studies of the present study may open new opportunities for research in
- 10 understanding and treating colorectal peritoneal metastases;
- 11 - Potential limitation: histopathological heterogeneity (i.e. enrolment allowed for both
- 12 appendiceal and colorectal primary tumors; and signet ring cell carcinoma).



## 1 Introduction

2 The peritoneum is a common metastatic site in colorectal cancer and the presence of colorectal  
3 peritoneal metastases (CPM) is characterized by a poor prognosis (1, 2). Most patients with CPM are  
4 treated with palliative intent (3). When treated with systemic therapy, patients with CPM have a  
5 shorter survival than patients with systemic metastases of colorectal cancer (4).

6 Theoretically, intraperitoneal chemotherapy could be an interesting palliative treatment option due to  
7 a favorable peritoneum-plasma concentration ratio (5). However, the use of intraperitoneal  
8 chemotherapy is limited by poor direct tumor penetration, inhomogeneous intraperitoneal drug  
9 distribution, and dose-limiting local toxicity (6, 7). Pressurized intraperitoneal aerosol chemotherapy  
10 (PIPAC) has been developed to overcome these limitations (8-11). PIPAC is a laparoscopic method for  
11 the repetitive intraperitoneal administration of low-dose chemotherapy as a pressurized aerosol,  
12 claiming enhanced tumor penetration, homogeneous intraperitoneal drug distribution, and low toxicity  
13 in preliminary studies (8-11). The first clinical reports have suggested that PIPAC is feasible, safe, and  
14 well tolerated in patients with peritoneal metastases of various primary tumors (12, 13). Given these  
15 results, PIPAC is currently implemented in a rapidly increasing number of centers worldwide (12, 14). In  
16 these centers, patients with CPM are generally treated with PIPAC with oxaliplatin (92 mg/m<sup>2</sup>) every six  
17 to eight weeks, with or without concomitant systemic therapy (14). Electrostatic precipitation of the  
18 aerosol is thought to enhance tissue penetration and is practiced in several centers (15-18).

19 Previously, a multicenter, single-arm, phase II study (CRC-PIPAC) investigated the safety, feasibility,  
20 anti-tumor activity, patient-reported outcomes (PROs), costs, and pharmacokinetics of repetitive  
21 electrostatic PIPAC with oxaliplatin (ePIPAC-OX) as a palliative monotherapy in 20 patients with isolated  
22 unresectable CPM in any line of palliative treatment (19, 20).

23 Repetitive ePIPAC-OX could also be added to first-line systemic therapy with the aim to maximize  
24 intraperitoneal tumor response and eliminate systemic micrometastases. The combination of first-line  
25 systemic therapy (including bevacizumab) and repetitive ePIPAC-OX, hereinafter referred to as first-line

1  
2  
3  
4  
5  
6  
7  
8  
9  
10  
11  
12  
13  
14  
15  
16  
17  
18  
19  
20  
21  
22  
23  
24  
25  
26  
27  
28  
29  
30  
31  
32  
33  
34  
35  
36  
37  
38  
39  
40  
41  
42  
43  
44  
45  
46  
47  
48  
49  
50  
51  
52  
53  
54  
55  
56  
57  
58  
59  
60

1 bidirectional therapy, is already offered to patients with isolated unresectable CPM in several PIPAC  
2 centers worldwide (14).

3           Despite its increasing use, the feasibility, safety, and anti-tumor activity of first-line bidirectional  
4 therapy have never been prospectively investigated in patients with isolated unresectable CPM in clinical  
5 trials with predefined eligibility criteria, interventions, and outcomes. Moreover, nothing is known about  
6 PROs and costs of – and the systemic pharmacokinetics of oxaliplatin during – first-line bidirectional  
7 therapy in this setting. As a first step to address this evidence gap, the present multicenter, single-arm,  
8 phase 2 study (CRC-PIPAC-II) aims to assess the safety, feasibility, anti-tumor activity, PROs, costs, and  
9 systemic pharmacokinetics of first-line bidirectional therapy in patients with isolated unresectable CPM.

peer review only

## 1 **Methods and analysis**

### 2 **Setting**

3 This study is performed in two Dutch tertiary referral centers for the surgical treatment of CPM.

### 4 **Eligibility criteria**

5 Eligibility criteria are:

- 6 -  $\geq 18$  years of age;
- 7 - World Health Organization performance status of 0-1;
- 8 - Histologically or cytologically proven peritoneal metastases of a colorectal or appendiceal  
9 carcinoma;
- 10 - Unresectable disease, defined as a Peritoneal Cancer Index (PCI)  $>20$  or if complete resection  
11 of peritoneal metastases is surgically not feasible, based on abdominal CT, laparoscopy, or  
12 laparotomy;
- 13 - Adequate organ functions (hemoglobin  $\geq 5.0$  mmol/L, neutrophils  $\geq 1.5 \times 10^9/L$ , platelets  
14  $\geq 100 \times 10^9/L$ , serum creatinine  $< 1.5 \times$  upper limit of normal [ULN], creatinine clearance  
15  $\geq 30$  mL/min, and liver transaminases  $< 5 \times$  ULN);
- 16 - No symptoms of gastrointestinal obstruction;
- 17 - No systemic metastases;
- 18 - No contraindications for the planned systemic therapy or laparoscopy;
- 19 - No previous PIPAC;
- 20 - No previous palliative systemic therapy for colorectal cancer;
- 21 - No (neo)adjuvant systemic therapy for colorectal cancer  $\leq 6$  months prior to enrolment;

### 22 **Interventions and procedures**

23 The study flowchart is shown in *Figure 1*. The schedule of enrolment, interventions, and assessments is  
24 shown in *Table 1*.

1  
2  
3 1  
4  
5  
6 2 All patients receive three cycles of first-line bidirectional therapy. Each cycle consists of six weeks of  
7  
8 3 first-line systemic therapy followed by one ePIPAC-OX. Study treatment ends after the third ePIPAC-OX  
9  
10 4 in all patients.

### 13 First-line palliative systemic therapy

16 6 The treating medical oncologist determines which of the following first-line regimens will be used:

- 19 7 - Two three-weekly cycles of CAPOX-bevacizumab (intravenous [IV] oxaliplatin [130 mg/m<sup>2</sup>  
20  
21 8 body-surface area (BSA)] on day 1, oral capecitabine [1000 mg/m<sup>2</sup> BSA] twice daily on days 1-  
22  
23 9 14, IV bevacizumab [7.5 mg/kg body weight] on day 1), or;
- 26 10 - Three two-weekly cycles of FOLFOX-bevacizumab (IV oxaliplatin [85 mg/m<sup>2</sup> BSA] on day 1, IV  
27  
28 11 leucovorin [400 mg/m<sup>2</sup> BSA] on day 1, IV bolus/continuous 5-fluorouracil [400/2400 mg/m<sup>2</sup>  
29  
30 12 BSA] on days 1-2, IV bevacizumab [5 mg/kg body weight] on day 1), or;
- 33 13 - Three two-weekly cycles of FOLFIRI-bevacizumab (IV irinotecan [180 mg/m<sup>2</sup> BSA] on day 1, IV  
34  
35 14 leucovorin [400 mg/m<sup>2</sup> BSA] on day 1, IV bolus/continuous 5-fluorouracil [400/2400 mg/m<sup>2</sup>  
36  
37 15 BSA] on days 1-2, IV bevacizumab [5 mg/kg body weight] on day 1), or;
- 39 16 - Three two-weekly cycles of FOLFOXIRI-bevacizumab (IV oxaliplatin [85 mg/m<sup>2</sup> BSA] on day 1, IV  
40  
41 17 irinotecan [165 mg/m<sup>2</sup> BSA] on day 1, IV leucovorin [400 mg/m<sup>2</sup> BSA] on day 1, IV continuous  
42  
43 18 5-fluorouracil [2400 mg/m<sup>2</sup> BSA] on days 1-2, IV bevacizumab [5 mg/kg body weight] on day 1).

46 19 These regimens are based on the ESMO and the Dutch guideline for the treatment of metastatic  
47  
48 20 colorectal cancer (21, 22). According to the ESMO guideline, both bevacizumab and anti-EGFR therapy  
49  
50 21 can be added to first-line systemic chemotherapy when disease control is the main goal of treatment.  
52  
53 22 According to the Dutch guideline, bevacizumab is the first-choice biological agent for the treatment of  
54  
55 23 metastatic colorectal cancer, as it can be administered to patients with wildtype KRAS and patients with  
56  
57 24 mutated KRAS, in contrast to anti-EGFR therapy.

1  
2  
3 1 Dose reductions, switches between allowed regimens, and management of toxicity are left to the  
4  
5 2 discretion of the treating medical oncologist. Dihydropyrimidine dehydrogenase status is assessed by  
6  
7 3 genotyping before the first administration of systemic therapy, and dosages of capecitabine or 5-  
8  
9 4 fluorouracil are modified accordingly (23).

#### 5 ePIPAC-OX

6 The procedure has been extensively described in the protocol of the CRC-PIPAC study (19,20). In  
7  
8 summary, after creating a 12 mmHg pneumoperitoneum with two balloon trocars using an open  
9  
10 introduction, an explorative laparoscopy is performed with adhesiolysis if needed to create enough  
11  
12 working space. If ePIPAC-OX seems feasible, leucovorin (20 mg/m<sup>2</sup> BSA in 10 minutes) and 5-  
13  
14 fluorouracil (400 mg/m<sup>2</sup> BSA in 15 minutes) are administered intravenously, since these drugs are  
15  
16 thought to increase the efficacy of oxaliplatin (24, 25). Meanwhile, ascites (or peritoneal lavage using  
17  
18 saline if ascites is absent) is evacuated and sent for cytology, the PCI and ascites volume are registered  
19  
20 (26), and three peritoneal metastases from different intraabdominal areas (if possible) are biopsied and  
21  
22 sent for histopathology. Biopsy locations are marked with clips to enable similar biopsies during  
23  
24 subsequent procedures.

25  
26  
27  
28  
29  
30  
31  
32  
33  
34  
35  
36  
37  
38  
39  
40  
41  
42  
43  
44  
45  
46  
47  
48  
49  
50  
51  
52  
53  
54  
55  
56  
57  
58  
59  
60

16 Then, after building the PIPAC setup and ensuring a leak-free pneumoperitoneum, oxaliplatin (92  
17  
18 mg/m<sup>2</sup> BSA [maximum 184 mg] diluted to a total volume of 150 mL in a 5% dextrose solution) is  
19  
20 aerosolized into the peritoneal cavity through a nebulizer (CapnoPen, Capnomed GmbH, Villingendorf,  
21  
22 Germany) using an angiographic injector at a maximum pressure of 200 psi and a flow of 30 mL/min, all  
23  
24 according to internationally used protocols (14). After formation of the aerosol in 5 minutes, it is  
25  
26 electrostatically precipitated for another 25 minutes using Ultravision technology (Alesi Surgical,  
27  
28 Cardiff, United Kingdom) as described by others (16), as this could enhance tumor penetration of  
29  
30 oxaliplatin (15).

31  
32  
33  
34  
35  
36  
37  
38  
39  
40  
41  
42  
43  
44  
45  
46  
47  
48  
49  
50  
51  
52  
53  
54  
55  
56  
57  
58  
59  
60

24 Then, the peritoneal cavity is exsufflated through a closed aerosol waste system, instruments are  
25  
26 removed, and incisions are closed.

1  
2  
3 1 Postoperatively, patients receive analgesics and anti-emetics according to local protocol. Standard  
4  
5 2 postoperative clinical evaluations are performed a few hours after ePIPAC-OX and on every  
6  
7 3 postoperative day until discharge. Postoperative laboratory tests are only performed if indicated.  
8  
9 4 Patients are intentionally discharged on the day of ePIPAC-OX or on the first postoperative day.

#### 12 5 Evaluations

15 6 Before each cycle of systemic therapy, patients undergo clinical and biochemical (i.e. tumor markers,  
16  
17 7 organ functions) evaluation by the treating medical oncologist. Before each ePIPAC-OX, patients  
18  
19 8 undergo clinical evaluation by the treating surgeon. During and shortly after ePIPAC-OX, patients  
20  
21 9 undergo macroscopic (i.e. peritoneal cancer index [PCI] (26)), ascites volume), histopathological (i.e.  
22  
23 10 peritoneal regression grading score [PRGS] of peritoneal biopsies (27,28)) and cytological evaluation.  
24  
25 11 Radiological evaluation is performed one week before the second ePIPAC-OX and four weeks after the  
26  
27 12 third ePIPAC-OX (29). Patients are discussed by a multidisciplinary tumor board after the second and  
28  
29 13 third ePIPAC-OX.

32  
33 14 After completing six weeks of systemic therapy, the subsequent ePIPAC-OX is planned within one to  
34  
35 15 four weeks thereafter. After ePIPAC-OX, systemic therapy is restarted one to four weeks  
36  
37 16 postoperatively. Study treatment is discontinued in case of physician-determined disease progression,  
38  
39 17 unacceptable toxicity, or physician's or patient's decision to discontinue participation. Study treatment  
40  
41 18 ends after the third ePIPAC-OX, regardless of response to therapy, after which patients receive  
42  
43 19 standard supportive, palliative, or curative care according to the Dutch national guideline without  
44  
45 20 further ePIPAC-OX (22).

#### 50 21 Pharmacokinetic sampling

51  
52  
53 22 Four mL of whole blood samples are collected in heparin tubes at multiple time points during and after  
54  
55 23 the first ePIPAC-OX as well as during and after the first cycle of systemic therapy:

- 56  
57  
58 24 - ePIPAC-OX: at t=0, t=0.5, t=1, t=2, and t=16 hours and t=1 week after intraperitoneal  
59  
60 25 oxaliplatin injection;

- 1  
2  
3 1 - CAPOX-bevacizumab: at t=0, t=0.5, t=1, and t=2 hours and t=3 weeks after intravenous  
4 administration of oxaliplatin;  
5 2  
6  
7 3 - FOLFOX-bevacizumab or FOLFOXIRI-bevacizumab: at t=0, t=0.5, t=1, t=2, t=48 hours and t=2  
8  
9 4 weeks after intravenous administration of oxaliplatin.

10  
11  
12 5 After direct centrifuging, a plasma aliquot is stored at -80°C until analysis. To obtain the free fraction of  
13  
14 6 oxaliplatin, a second 1 mL plasma aliquot is centrifuged through an ultrafiltration membrane and stored  
15  
16 7 at -80°C until analysis. Oxaliplatin concentrations are measured using atomic absorption spectrometry  
17  
18 8 performed on a Thermo Fisher Solaar ICE 3500 graphite-furnace spectrophotometer with Zeeman  
19  
20 9 correction (Thermo Fisher Scientific, Bremen, Germany).

#### 21 22 23 24 10 Translational research

25  
26  
27 11 Two 10 mL cell-free DNA BCT tubes (Streck, La Vista, Nebraska, USA) are used to collect 20 mL of whole  
28  
29 12 blood at baseline and before each ePIPAC-OX. Tubes are sent to a central laboratory for isolation and  
30  
31 13 storage (-80°C) of plasma and cell pellet according to the manufacturer's instructions. Collected ascites  
32  
33 14 or peritoneal lavage is centrifuged twice (5 minutes, 420 g, zero break) under sterile conditions. The  
34  
35 15 supernatant is snap frozen and stored (-80°C) until further analysis. The cell pellet is suspended into an  
36  
37 16 organoid culture medium at 4°C for transport and further preparation.

#### 38 39 40 41 17 Outcomes

42  
43  
44 18 The primary outcome is the number of patients with – and procedures leading to – grade ≥3 adverse  
45  
46 19 events according to the Common Terminology Criteria for Adverse Events (CTCAE) v5.0 (primary  
47  
48 20 classification) and Clavien-Dindo (secondary classification) up to four weeks after the last ePIPAC-OX  
49  
50 21 (30, 31).

51  
52  
53 22 Secondary outcomes are:

- 54  
55  
56 23 - The number of completed cycles of bidirectional therapy in each patient and reasons for  
57  
58 24 discontinuation;

- 1
- 2
- 3 1 - Characteristics of systemic therapy (e.g. administered regimens, number of completed cycles,
- 4
- 5 2 dose reductions);
- 6
- 7 3 - Characteristics of ePIPAC-OX (e.g. intraoperative complications, operating time);
- 8
- 9 4 - The number of patients with – and procedures leading to – grade  $\leq 2$  adverse events according
- 10
- 11 5 to the CTCAE v5.0 (primary classification) and Clavien-Dindo (secondary classification) up to
- 12
- 13 6 four weeks after the last ePIPAC-OX (30, 31);
- 14
- 15
- 16 7 - Hospital stay, defined as the number of days between ePIPAC-OX and initial discharge;
- 17
- 18 8 - Readmissions, defined as any unplanned hospital admission after initial discharge up to four
- 19
- 20 9 weeks after the last ePIPAC-OX;
- 21
- 22
- 23 10 - Radiological tumor response, centrally evaluated by two assessors blinded to clinical
- 24
- 25 11 outcomes, using the Response Evaluation Criteria In Solid Tumors v1.1 and the radiological PCI
- 26
- 27 12 (29) ;
- 28
- 29
- 30 13 - Histopathological tumor response, centrally evaluated by two assessors blinded to clinical
- 31
- 32 14 outcomes, using the four tier PRGS of collected peritoneal biopsies during each ePIPAC-OX (27,
- 33
- 34 15 28);
- 35
- 36 16 - Macroscopic tumor response, based on the PCI during each ePIPAC-OX;
- 37
- 38 17 - Ascites response, based on ascites volume during each ePIPAC-OX;
- 39
- 40
- 41 18 - Biochemical tumor response, based on carcinoembryonic antigen (CEA) levels at baseline and
- 42
- 43 19 before each ePIPAC-OX;
- 44
- 45 20 - Cytological tumor response, based on the presence or absence of malignant cells in ascites or
- 46
- 47 21 peritoneal lavage collected during each ePIPAC-OX;
- 48
- 49
- 50 22 - PROs, based on the EQ-5D-5L (32), EORTC QLQ-C30 (33), and EORTC QLQ-CR29 (34)
- 51
- 52 23 questionnaires at baseline, one week before the first ePIPAC-OX, and one and four weeks after
- 53
- 54 24 each ePIPAC-OX;
- 55
- 56 25 - The bioavailability of oxaliplatin, based on the systemic pharmacokinetics of oxaliplatin during
- 57
- 58 26 and after one intravenous administration, as well as during and after one ePIPAC-OX;
- 59
- 60



- 1  
2  
3 1 - Costs, derived from the Dutch cost guideline for healthcare research at the time of analysis,  
4  
5 2 based on hospital information systems, case report forms, and the iMTA Productivity cost  
6  
7 3 questionnaire (35) and the iMTA Medical consumption questionnaire (36) at baseline and four  
8  
9 4 weeks after each ePIPAC-OX;  
10  
11 5 - Progression-free survival, defined as the time between enrolment and physician-determined  
12  
13 6 disease progression or death;  
14  
15  
16 7 - Overall survival, defined as the time between enrolment and death.  
17  
18

### 19 **Sample size**

20  
21  
22 9 Given the absence of data to guide a sample size calculation, the central ethics committee approved a  
23  
24 10 pragmatically determined sample size of 20 patients as a sufficient number to explore the safety,  
25  
26 11 feasibility, and anti-tumor activity of the study treatment, similar to the CRC-PIPAC study (19, 20).  
27  
28 12 Enrolled patients who are unable to receive the first ePIPAC-OX are replaced to enrol a total number of  
29  
30 13 20 patients who receive at least one cycle of bidirectional therapy.  
31  
32

### 33 **Recruitment**

34  
35  
36 15 The study commenced on 30 January 2020 and the first patient was enrolled on 5 February 2020. The  
37  
38 16 investigators expect to complete accrual within a maximum of three years. Strategies for achieving  
39  
40 17 adequate patient accrual are not defined a priori.  
41  
42  
43

### 44 **Data collection and data management**

45  
46  
47 19 Outcomes are collected in all patients who complete at least one cycle of bidirectional therapy. All  
48  
49 20 baseline characteristics and outcomes are prospectively collected by a local investigator in each study  
50  
51 21 center using standardized electronic case report forms linked to an ISO 27001 certified central study  
52  
53 22 database (De Research Manager, Deventer, the Netherlands). This ISO 27001 certified system optimizes  
54  
55 23 data quality by standardized data entry, coding, security, and storage.  
56  
57  
58

### 59 **Statistical methods**

1  
2  
3 1 Continuous data are presented as a median with (interquartile) range and categorical data are  
4  
5 2 presented as number (percentage). Due to the single-arm design of the present study and the  
6  
7 3 explorative nature of the analyzed outcomes, basic statistical methods are not defined a priori. These  
8  
9 4 methods will be defined before data analysis. Time-to-event variables, such as progression-free and  
10  
11 5 overall survival, are analyzed and presented using the Kaplan-Meier method.

#### 14 6 **Data monitoring**

17 7 Interim analyses are performed four weeks after the fifth, fifteenth, thirtieth and forty-fifth procedure.  
18  
19 8 The study is terminated, or temporarily halted for evaluation and potential adaption of the study  
20  
21 9 protocol, if more than three CTCAE grade 3 or 4 adverse events occur or more than one CTCAE grade 5  
22  
23 10 adverse event occur that are considered directly related to ePIPAC-OX. Adverse events related to  
24  
25 11 systemic therapy are not included in the stopping rules. If the study is terminated, enrolled patients do  
26  
27 12 not receive any further ePIPAC-OX. The principal investigators (IHJTH and DB) have access to the  
28  
29 13 interim results and make the final decision to terminate or continue the study. No data monitoring  
30  
31 14 committee was formed for this study.

#### 36 15 **Harms**

39 16 All serious adverse events (SAEs) or suspected unexpected serious adverse reactions (SUSARs) that  
40  
41 17 occur from enrolment up to four weeks after the last ePIPAC-OX are reported by local investigators to  
42  
43 18 the coordinating investigator within 24 hours. The coordinating investigator reports these SAEs/SUSARs  
44  
45 19 to the central ethics committee within 7 days of first knowledge for lethal or life-threatening  
46  
47 20 SAEs/SUSARs, and within 15 days for other SAEs/SUSARs.

#### 51 21 **Auditing**

53 22 Auditing is performed by independent qualified monitors of the study centers. The study is considered a  
54  
55 23 medium risk study according to the brochure 'Kwaliteitsborging mensgebonden onderzoek 2.0' by the  
56  
57 24 Dutch Federation of University Medical Centers, meaning that study centers are audited two to three  
58  
59  
60

1  
2  
3 1 times per year, depending on enrolment, with 25% auditing of the study master file, investigator site  
4  
5 2 files, informed consent forms, eligibility criteria, source data verification, and SAEs/SUSARs.  
6  
7

### 8 **Patient and public involvement**

9  
10 4 Patients are not involved in the design, recruitment, and conduct of the study, but will be involved in  
11  
12  
13 5 the dissemination of study results.  
14  
15

## 16 **Ethics and dissemination**

### 17 **Research ethics approval**

18  
19 7  
20 8 The present study is approved by a central ethics committee (MEC-U, Nieuwegein, Netherlands,  
21  
22  
23 9 number R19.087) and the institutional review boards of both study centers.  
24  
25  
26

### 27 **Protocol amendments**

28  
29  
30 11 Important modifications to the study protocol need to be authorized by the central ethics committee.  
31  
32 12 After authorization, these modifications are communicated to the Dutch competent authority, the  
33  
34 13 institutional review boards of both study centers, all investigators, study registries, and patients (if  
35  
36 14 required by the central ethics committee).  
37  
38  
39

### 40 **Informed consent**

41  
42  
43 16 Patients are enrolled by their treating physician and provide written informed consent. Patients are  
44  
45 17 able to give separate consent for participation in translational side studies.  
46  
47

### 48 **Confidentiality**

49  
50  
51 19 Personal data of patients is collected, shared and maintained according to the Dutch law.  
52  
53

### 54 **Access to data**

55  
56  
57 21 All authors have access to the final dataset, without any contractual agreements that limit such access.  
58  
59

### 60 **Ancillary and post-study care**

1  
2  
3 1 One of the study centers (Catharina Hospital, Eindhoven, the Netherlands) is insured to cover harms  
4  
5 2 caused by study participation in either participating hospital. After stopping study treatment, patients  
6  
7 3 receive further supportive, palliative, or curative intent treatment according to Dutch guideline (22).  
8  
9

#### 10 4 **Dissemination policy**

11  
12  
13 5 Study results will be personally communicated to participants, submitted for publication in peer-  
14  
15 6 reviewed medical journals, and presented to patients, healthcare professionals, and the public during  
16  
17 7 (inter)national meetings. Authorship eligibility guidelines are not defined a priori. The full study  
18  
19 8 protocol and the Dutch informed consent form are available from the corresponding author. After  
20  
21 9 study completion, the participant-level dataset and statistical code will be available on reasonable  
22  
23  
24 10 request.  
25  
26  
27 11

## 30 12 **Discussion**

31  
32  
33 13 To the knowledge of the authors, CRC-PIPAC-II is the first study that prospectively investigates the  
34  
35 14 safety, feasibility, anti-tumor activity, PROs, costs and systemic pharmacokinetics of first-line systemic  
36  
37 15 chemotherapy and bevacizumab alternated with repetitive ePIPAC-OX (i.e. first-line bidirectional  
38  
39 16 therapy) in patients with isolated unresectable CPM.  
40  
41  
42

43 17 The present study has several strengths. All patients in the present study receive standard first-line  
44  
45 18 systemic regimens based on the ESMO guideline for the treatment of metastatic colorectal cancer (21),  
46  
47 19 which contrasts the heterogeneity in treatment lines in available studies on (e)PIPAC-OX for CPM. The  
48  
49 20 homogeneity in first-line treatment may facilitate a comparison between the present study and other  
50  
51 21 first-line studies in metastatic colorectal cancer. Furthermore, assessment of outcomes such as PROs,  
52  
53 22 costs, and systemic pharmacokinetics will provide further insight in the tolerability, costs, and  
54  
55 23 pharmacokinetic profile of first-line bidirectional therapy in this setting. Translational side studies may  
56  
57 24 open new opportunities for research in understanding and treating CPM.  
58  
59  
60

1  
2  
3 1 A potential limitation of the present study is the histopathological heterogeneity of the study  
4  
5 2 population, since the eligibility criteria allow the enrolment of patients with both colorectal and  
6  
7 3 appendiceal carcinomas, as well as including distinct pathological features such as signet ring cell  
8  
9 4 histology. Furthermore, different first-line palliative systemic regimens are allowed, including  
10  
11 5 FOLFOXIRI-bevacizumab, which might result in clinical heterogeneity. Although the potential clinical  
12  
13 6 and histopathological heterogeneity could impede the interpretation of preliminary efficacy outcomes,  
14  
15 7 this is not the major focus of this study.

16  
17  
18  
19 8 With regards to the chemotherapy regimen used in this study, the results of the recently published  
20  
21 9 PRODIGE-7 trial may question the intraperitoneal use of oxaliplatin (combined with 5-fluorouracil and  
22  
23 10 leucovorin) in patients with CPM (37). However, in contrast with PRODIGE-7, patients in the present  
24  
25 11 study are either systemic therapy-naïve or had undergone a mandatory six-month wash-out period of  
26  
27 12 systemic therapy. As a result, the previously untreated patients in this study may be more sensitive to  
28  
29 13 intraperitoneal oxaliplatin than patients in the PRODIGE-7 trial.

30  
31  
32  
33 14 Most importantly, patients in the present study undergo palliative instead of curative intent treatment  
34  
35 15 and receive repetitive instead of a single administration of intraperitoneal oxaliplatin. Repetitive PIPAC-  
36  
37 16 OX (with or without intraoperative intravenous bolus 5-fluorouracil/leucovorin) is increasingly offered  
38  
39 17 and frequently combined with first-line systemic chemotherapy and bevacizumab in many centers  
40  
41 18 worldwide (12, 14, 38, 39). Despite the increasing use, the safety and feasibility of this combination has  
42  
43 19 never been prospectively investigated in clinical trials. Altogether, it remains important to assess the  
44  
45 20 feasibility and safety of the combination of first-line palliative systemic therapy and repetitive PIPAC-  
46  
47 21 OX, hence the major focus of this study.

48  
49  
50  
51 22 With regards to the oxaliplatin dose during PIPAC, two phase 1 dose-escalation trials recently assessed  
52  
53 23 the maximum tolerated dose of repetitive PIPAC-OX for unresectable peritoneal metastases of various  
54  
55 24 origins (40, 41). The French PIPOX trial observed two dose-limiting toxicities of systemic therapy with  
56  
57 25 repetitive PIPAC-OX at 140 mg/m<sup>2</sup> and the investigators defined a maximum tolerated dose of  
58  
59 26 repetitive PIPAC-OX of 90 mg/m<sup>2</sup>. The PIPAC-OX trial from Singapore reported no dose-limiting

1  
2  
3 1 toxicities with repetitive PIPAC-OX 120 mg/m<sup>2</sup> monotherapy, however, this trial was prematurely  
4  
5 2 terminated due to the dose-limiting toxicities of the PIPOX trial. As a result, both trials are currently  
6  
7 3 recruiting phase 2 expansion cohorts to investigate various systemic regimens combined with repetitive  
8  
9 4 PIPAC-OX at 90 mg/m<sup>2</sup>: a dose similar to the oxaliplatin dose in the current trial.  
10  
11  
12 5 Results of several other ongoing single-arm, phase II studies are closely monitored. The first study  
13  
14 6 primarily assesses the histopathological response of PIPAC with various drugs for peritoneal metastases  
15  
16 7 of various origins (including PIPAC-OX for CPM), with or without concomitant systemic therapy, in 137  
17  
18 8 patients in any line of palliative treatment (42). The second study assesses the safety of PIPAC with  
19  
20 9 various drugs for peritoneal metastases of various origins (including PIPAC-OX for CPM), with or without  
21  
22 10 concomitant systemic therapy, in 16 patients in a later line of palliative treatment (Clinicaltrials.gov,  
23  
24 11 NCT04329494). The third study assesses progression-free survival of 30 patients with CPM receiving  
25  
26 12 PIPAC-OX, with or without concomitant systemic therapy, in any line of palliative treatment  
27  
28 13 (Clinicaltrials.gov, NCT03868228). Results of the previous CRC-PIPAC study, the present CRC-PIPAC-II  
29  
30 14 study, and these ongoing studies may help designing future randomized trials to determine the role of  
31  
32 15 (e)PIPAC-OX in the palliative treatment of patients with isolated unresectable CPM.  
33  
34  
35  
36  
37  
38  
39  
40  
41  
42  
43  
44  
45  
46  
47  
48  
49  
50  
51  
52  
53  
54  
55  
56  
57  
58  
59  
60

## 1 **Author Contributions**

2 RL and PR are the coordinating investigators. RL, KR, AT, GC, JB, SN, and IH are the local investigators of  
3 the first study center. PR, EW, KH, ML, MW, and DB are the local investigators of the second study  
4 center. MD is the study pharmacologist supervising the pharmacokinetic analyses. JN and EH are the  
5 study radiologists performing the central radiological review. CH and CS are the study pathologists  
6 performing the central histopathological review. IE and RF are responsible for translational research on  
7 blood. AC and OK are responsible for translational research on ascites and peritoneal lavage. IH is the  
8 principal investigator. RL, PR, DB, and IH made substantial contributions to the conception and design  
9 of the study, drafted the protocol and drafted the manuscript. KR, AT, GC, JB, SN, EW, KH, ML, MW,  
10 MD, JN, EH, CH, CS, IE, RF, AC, and OK made substantial contributions to conception and design of the  
11 study and critically revised the protocol and the manuscript for important intellectual content. RL, PR,  
12 KR, EW, MD, JN, CH, IE, RF, EH, CS, AC, OK, ML, KH, AT, GC, JB, MW, SN, DB and IH gave final approval of  
13 the version to be published and agree to be accountable for all aspects of the work.

1  
2  
3 1 **Tables**

4 2 Table 1. Schedule of enrolment, interventions and assessments.

|                                                       | Enrolment | Baseline | First six weeks first-line systemic therapy | First ePIPAC-OX | Second six weeks first-line systemic therapy | Second ePIPAC-OX | Third six weeks first-line systemic therapy | Third ePIPAC-OX | Final evaluation | Follow-up |
|-------------------------------------------------------|-----------|----------|---------------------------------------------|-----------------|----------------------------------------------|------------------|---------------------------------------------|-----------------|------------------|-----------|
| <b>Enrolment</b>                                      |           |          |                                             |                 |                                              |                  |                                             |                 |                  |           |
| Eligibility Screen                                    | X         |          |                                             |                 |                                              |                  |                                             |                 |                  |           |
| Informed consent                                      | X         |          |                                             |                 |                                              |                  |                                             |                 |                  |           |
| <b>Interventions</b>                                  |           |          |                                             |                 |                                              |                  |                                             |                 |                  |           |
| Blood samples (organ functions, tumor markers)        |           | X        | X                                           | X               | X                                            | X                | X                                           | X               | X                | X         |
| Thoracoabdominal CT                                   |           | X        |                                             |                 | X (c)                                        |                  |                                             |                 | X                |           |
| Diffusion-weighted MRI peritoneum                     |           | X        |                                             |                 |                                              |                  |                                             |                 | X                |           |
| Collection of ascites or peritoneal lavage            |           |          |                                             | X               |                                              | X                |                                             | X               |                  |           |
| Peritoneal biopsies                                   |           |          |                                             | X               |                                              | X                |                                             | X               |                  |           |
| Questionnaires: Patient reported outcomes             |           | X        | X (a)                                       |                 | X (d)                                        |                  | X (d)                                       |                 | X (d)            |           |
| Questionnaires: Costs                                 |           | X        |                                             |                 | X (e)                                        |                  | X (e)                                       |                 | X (e)            |           |
| Blood samples for pharmacokinetics                    |           |          | X                                           | X               |                                              |                  |                                             |                 |                  |           |
| Translational research (blood)                        |           | X        |                                             | X (b)           |                                              | X (b)            |                                             | X (b)           |                  |           |
| Translational research (ascites or peritoneal lavage) |           |          |                                             | X               |                                              | X                |                                             | X               |                  |           |
| <b>Assessments</b>                                    |           |          |                                             |                 |                                              |                  |                                             |                 |                  |           |
| Baseline characteristics                              |           | X        |                                             |                 |                                              |                  |                                             |                 |                  |           |
| Treatment-related characteristics (systemic therapy)  |           |          | X                                           |                 | X                                            |                  | X                                           |                 |                  |           |
| Treatment-related characteristics (ePIPAC-OX)         |           |          |                                             | X               |                                              | X                |                                             | X               |                  |           |



|                            |   |       |   |       |   |   |       |   |       |
|----------------------------|---|-------|---|-------|---|---|-------|---|-------|
| Adverse events             |   | X     | X | X     | X | X | X     | X |       |
| Hospital stay              |   |       | X |       |   | X |       | X |       |
| Readmissions               |   |       |   | X     |   |   | X     |   | X     |
| Clinical evaluation        | X | X     | X | X     | X | X | X     | X | X     |
| Biochemical response       |   | X     | X | X     | X | X | X     | X | X     |
| Radiological response      |   |       |   | X (c) |   |   |       |   | X     |
| Histopathological response |   |       | X |       |   | X |       | X |       |
| Cytological response       |   |       | X |       |   | X |       | X |       |
| Macroscopic response       |   |       | X |       |   | X |       | X |       |
| Ascites response           |   |       | X |       |   | X |       | X |       |
| Patient-reported outcomes  | X | X (a) |   | X (d) |   |   | X (d) |   | X (d) |
| Costs                      | X |       |   | X (e) |   |   | X (e) |   | X (e) |
| Progression-free survival  |   | X     | X | X     | X | X | X     | X | X     |
| Overall survival           |   | X     | X | X     | X | X | X     | X | X     |

CT, Computed tomography; ePIPAC-OX, electrostatic Pressurized Intraperitoneal Aerosol Chemotherapy with oxaliplatin; MRI, Magnetic Resonance Imaging; (a) one week before the first ePIPAC-OX; (b) just before ePIPAC-OX; (c) one week before the second ePIPAC-OX; (d) one and four weeks after ePIPAC-OX; (e) four weeks after ePIPAC-OX.

1  
2  
3 **1 Figures**  
4

5  
6 **2 Figure titles:**  
7

8  
9 **3 Figure 1.** Study flowchart.  
10

11  
12 **4 Figure legends:**  
13

14  
15 **5 Figure 1.** *B* bloods (organ functions and tumor markers); *C* cytology (ascites or peritoneal lavage); *CRS*  
16  
17 *cytoreductive surgery*; *ePIPAC-OX* electrostatic pressurized intraperitoneal aerosol chemotherapy with  
18  
19 *oxaliplatin*; *H* histopathology (peritoneal biopsies); *MDT* multidisciplinary tumor board; *HIPEC*  
20  
21 *hyperthermic intraperitoneal chemotherapy*; *P* pharmacokinetic sampling; *Q* questionnaires (costs and  
22  
23 *patient-reported outcomes*); *Q\** questionnaires (patient-reported outcomes); *R* radiology  
24  
25 *(thoracoabdominal CT, diffusion-weighted MRI peritoneum)*; *R\** thoracoabdominal CT; *T* translational  
26  
27 *research (blood and ascites or peritoneal lavage)*; *T\** translational research (blood).  
28  
29  
30  
31  
32  
33  
34  
35  
36  
37  
38  
39  
40  
41  
42  
43  
44  
45  
46  
47  
48  
49  
50  
51  
52  
53  
54  
55  
56  
57  
58  
59  
60

## References

1. van der Geest LG, Lam-Boer J, Koopman M, Verhoef C, Elferink MA, de Wilt JH. Nationwide trends in incidence, treatment and survival of colorectal cancer patients with synchronous metastases. *Clin Exp Metastasis*. 2015;32(5):457-65.
2. Lurvink RJ, Bakkers C, Rijken A, van Erning FN, Nienhuijs SW, Burger JW, et al. Increase in the incidence of synchronous and metachronous peritoneal metastases in patients with colorectal cancer: a nationwide study. *Eur J Surg Oncol*. 2021; *in press*.
3. Razenberg LG, Lemmens VE, Verwaal VJ, Punt CJ, Tanis PJ, Creemers GJ, et al. Challenging the dogma of colorectal peritoneal metastases as an untreatable condition: Results of a population-based study. *Eur J Cancer*. 2016;65:113-20.
4. Franko J, Shi Q, Meyers JP, Maughan TS, Adams RA, Seymour MT, et al. Prognosis of patients with peritoneal metastatic colorectal cancer given systemic therapy: an analysis of individual patient data from prospective randomised trials from the Analysis and Research in Cancers of the Digestive System (ARCAD) database. *Lancet Oncol*. 2016;17(12):1709-19.
5. Dedrick RL, Myers CE, Bungay PM, DeVita VT, Jr. Pharmacokinetic rationale for peritoneal drug administration in the treatment of ovarian cancer. *Cancer Treat Rep*. 1978;62(1):1-11.
6. Dedrick RL, Flessner MF. Pharmacokinetic problems in peritoneal drug administration: tissue penetration and surface exposure. *J Natl Cancer Inst*. 1997;89(7):480-7.
7. Markman M. Intraperitoneal antineoplastic drug delivery: rationale and results. *Lancet Oncol*. 2003;4(5):277-83.
8. Solass W, Hetzel A, Nadiradze G, Sagynaliev E, Reymond MA. Description of a novel approach for intraperitoneal drug delivery and the related device. *Surg Endosc*. 2012;26(7):1849-55.
9. Solass W, Herbet A, Schwarz T, Hetzel A, Sun JS, Dutreix M, et al. Therapeutic approach of human peritoneal carcinomatosis with Dbait in combination with capnoperitoneum: proof of concept. *Surg Endosc*. 2012;26(3):847-52.
10. Solass W, Kerb R, Murdter T, Giger-Pabst U, Strumberg D, Tempfer C, et al. Intraperitoneal chemotherapy of peritoneal carcinomatosis using pressurized aerosol as an alternative to liquid solution: first evidence for efficacy. *Ann Surg Oncol*. 2014;21(2):553-9.
11. Blanco A, Giger-Pabst U, Solass W, Zieren J, Reymond MA. Renal and hepatic toxicities after pressurized intraperitoneal aerosol chemotherapy (PIPAC). *Ann Surg Oncol*. 2013;20(7):2311-6.
12. Alyami M, Hubner M, Grass F, Bakrin N, Villeneuve L, Laplace N, et al. Pressurised intraperitoneal aerosol chemotherapy: rationale, evidence, and potential indications. *Lancet Oncol*. 2019;20(7):e368-e77.
13. Grass F, Vuagniaux A, Teixeira-Farinha H, Lehmann K, Demartines N, Hubner M. Systematic review of pressurized intraperitoneal aerosol chemotherapy for the treatment of advanced peritoneal carcinomatosis. *Br J Surg*. 2017;104(6):669-78.
14. Nowacki M, Alyami M, Villeneuve L, Mercier F, Hubner M, Willaert W, et al. Multicenter comprehensive methodological and technical analysis of 832 pressurized intraperitoneal aerosol chemotherapy (PIPAC) interventions performed in 349 patients for peritoneal carcinomatosis treatment: An international survey study. *Eur J Surg Oncol*. 2018;44(7):991-6.
15. Kakchekeeva T, Demtroder C, Herath NI, Griffiths D, Torkington J, Solass W, et al. In Vivo Feasibility of Electrostatic Precipitation as an Adjunct to Pressurized Intraperitoneal Aerosol Chemotherapy (ePIPAC). *Ann Surg Oncol*. 2016;23(Suppl 5):592-8.
16. Willaert W, Van de Sande L, Van Daele E, Van De Putte D, Van Nieuwenhove Y, Pattyn P, et al. Safety and preliminary efficacy of electrostatic precipitation during pressurized intraperitoneal aerosol chemotherapy (PIPAC) for unresectable carcinomatosis. *Eur J Surg Oncol*. 2019;45(12):2302-9.
17. Gravensen M, Detlefsen S, Ellebaek SB, Fristrup C, Pfeiffer P, Mortensen MB. Pressurized IntraPeritoneal Aerosol Chemotherapy with one minute of electrostatic precipitation (ePIPAC) is

feasible, but the histological tumor response in peritoneal metastasis is insufficient. *Eur J Surg Oncol.* 2020;46(1):155-9.

18. Reymond M, Demtroder C, Solass W, Winnekendonk G, Tempfer C. Electrostatic precipitation Pressurized Intraperitoneal Aerosol Chemotherapy (ePIPAC): first in-human application. *Pleura Peritoneum.* 2016;1(2):109-16.

19. Rovers KP, Lurvink RJ, Wassenaar EC, Kootstra TJ, Scholten HJ, Tajzai R, et al. Repetitive electrostatic pressurised intraperitoneal aerosol chemotherapy (ePIPAC) with oxaliplatin as a palliative monotherapy for isolated unresectable colorectal peritoneal metastases: protocol of a Dutch, multicentre, open-label, single-arm, phase II study (CRC-PIPAC). *BMJ Open.* 2019;9(7):e030408.

20. Rovers KP, Wassenaar EC, Lurvink RJ, Creemers GJ, Burger JWA, Los M, et al. Pressurized Intraperitoneal Aerosol Chemotherapy (oxaliplatin) for unresectable colorectal peritoneal metastases: a multicenter, single-arm, phase 2 trial (CRC-PIPAC). *Ann Surg Oncol.* 2021; *in press.*

21. Van Cutsem E, Cervantes A, Adam R, Sobrero A, Van Krieken JH, Aderka D, et al. ESMO consensus guidelines for the management of patients with metastatic colorectal cancer. *Ann Oncol.* 2016;27(8):1386-422.

22. Landelijke werkgroep Gastro Intestinale Tumoren. Richtlijn colorectaal carcinoom. 2014 <https://www.oncoline.nl/colorectaalcarcinoom> (Accessed 01 September 2020).

23. Lunenburg C, van der Wouden CH, Nijenhuis M, Crommentuijn-van Rhenen MH, de Boer-Veger NJ, Buunk AM, et al. Dutch Pharmacogenetics Working Group (DPWG) guideline for the gene-drug interaction of DPYD and fluoropyrimidines. *Eur J Hum Genet.* 2020;28(4):508-17.

24. Elias D, Bonnay M, Puizillou JM, Antoun S, Demirdjian S, El OA, et al. Heated intra-operative intraperitoneal oxaliplatin after complete resection of peritoneal carcinomatosis: pharmacokinetics and tissue distribution. *Ann Oncol.* 2002;13(2):267-72.

25. Giacchetti S, Perpoint B, Zidani R, Le Bail N, Faggiuolo R, Focan C, et al. Phase III multicenter randomized trial of oxaliplatin added to chronomodulated fluorouracil-leucovorin as first-line treatment of metastatic colorectal cancer. *J Clin Oncol.* 2000;18(1):136-47.

26. Jacquet P, Sugarbaker PH. Clinical research methodologies in diagnosis and staging of patients with peritoneal carcinomatosis. *Cancer Treat Res.* 1996;82:359-74.

27. Solass W, Sempoux C, Detlefsen S, Carr NJ, Bibeau F. Peritoneal sampling and histological assessment of therapeutic response in peritoneal metastasis: proposal of the Peritoneal Regression Grading Score (PRGS). *Pleura Peritoneum.* 2016;1(2):99-107.

28. Solass W, Sempoux C, Carr NJ, Bibeau F, Neureiter D, Jager T, et al. Reproducibility of the peritoneal regression grading score for assessment of response to therapy in peritoneal metastasis. *Histopathology.* 2019;74(7):1014-24.

29. Eisenhauer EA, Therasse P, Bogaerts J, Schwartz LH, Sargent D, Ford R, et al. New response evaluation criteria in solid tumours: revised RECIST guideline (version 1.1). *Eur J Cancer.* 2009;45(2):228-47.

30. National Cancer Institute. Common Terminology Criteria for Adverse Events (CTCAE) v5.0. 2017. [https://ctep.cancer.gov/protocolDevelopment/electronic\\_applications/docs/CTCAE\\_v5\\_Quick\\_Reference\\_5x7.pdf](https://ctep.cancer.gov/protocolDevelopment/electronic_applications/docs/CTCAE_v5_Quick_Reference_5x7.pdf) (Accessed 01 September 2020).

31. Dindo D, Demartines N, Clavien PA. Classification of surgical complications: a new proposal with evaluation in a cohort of 6336 patients and results of a survey. *Ann Surg* 2004;240:205-13.

32. Herdman M, Gudex C, Lloyd A, Janssen M, Kind P, Parkin D, et al. Development and preliminary testing of the new five-level version of EQ-5D (EQ-5D-5L). *Qual Life Res.* 2011;20(10):1727-36.

33. Aaronson NK, Ahmedzai S, Bergman B, Bullinger M, Cull A, Duez NJ, et al. The European Organization for Research and Treatment of Cancer QLQ-C30: a quality-of-life instrument for use in international clinical trials in oncology. *J Natl Cancer Inst.* 1993;85(5):365-76.

- 1  
2  
3 34. Stiggelbout AM, Kunneman M, Baas-Thijssen MC, Neijenhuis PA, Loor AK, Jagers S, et al. The  
4 EORTC QLQ-CR29 quality of life questionnaire for colorectal cancer: validation of the Dutch version.  
5 Qual Life Res. 2016;25(7):1853-8.  
6  
7 35. Bouwmans C, Krol M, Severens H, Koopmanschap M, Brouwer W, Hakkaart-van Roijen L. The  
8 iMTA Productivity Cost Questionnaire: A Standardized Instrument for Measuring and Valuing Health-  
9 Related Productivity Losses. Value Health. 2015;18(6):753-8.  
10 36. iMTA Productivity and Health Research Group. Handleiding iMTA Medical Cost Questionnaire  
11 (iMCQ). Rotterdam: iMTA, Erasmus Universiteit Rotterdam. 2018.  
12 37. Quénet F, Elias D, Roca L, Goéré D, Ghouti L, Pocard M, et al. Cytoreductive surgery plus  
13 hyperthermic intraperitoneal chemotherapy versus cytoreductive surgery alone for colorectal  
14 peritoneal metastases (PRODIGE 7): a multicentre, randomised, open-label, phase 3 trial. Lancet  
15 Oncol. 2021.  
16 38. Siebert M, Alyami M, Mercier F, Gallice C, Villeneuve L, Laplace N, et al. Pressurized  
17 intraperitoneal aerosol chemotherapy (PIPAC) in association with systemic chemotherapy and  
18 bevacizumab, evaluation of safety and feasibility. A single center comparative study. Eur J Surg Oncol.  
19 2021; 47(1):139-142.  
20 39. Sgarbura O, Villeneuve L, Alyami M, Bakrin N, Torrent JJ, Eveno C, et al. Current practice of  
21 pressurized intraperitoneal aerosol chemotherapy (PIPAC): still standardized or on the verge of  
22 diversification? Eur J Surg Oncol. 2021; 47(1):149-156.  
23 40. Dumont F, Passot C, Raoul JL, Kepenekian V, Lelièvre B, Boisdron-Celle M, et al. A phase I  
24 dose-escalation study of oxaliplatin delivered via a laparoscopic approach using pressurized  
25 intraperitoneal aerosol chemotherapy for advanced peritoneal metastases of gastrointestinal tract  
26 cancers. Eur J Cancer. 2020;140:37-44.  
27 41. Kim G, Tan HL, Sundar R, Lieske B, Chee CE, Ho J, et al. PIPAC-OX: a phase I study of  
28 oxaliplatin-based pressurized intraperitoneal aerosol chemotherapy (PIPAC) in patients with  
29 peritoneal metastases. Clin Cancer Res. 2020.  
30 42. Graversen M, Detlefsen S, Asmussen J, Mahdi B, Fristrup C, Pfeiffer P, et al. Treatment of  
31 peritoneal carcinomatosis with Pressurized IntraPeritoneal Aerosol Chemotherapy - PIPAC-OPC2.  
32 Pleura Peritoneum. 2018;3(2):20180108.  
33  
34  
35  
36  
37  
38  
39  
40  
41  
42  
43  
44  
45  
46  
47  
48  
49  
50  
51  
52  
53  
54  
55  
56  
57  
58  
59  
60

1  
2  
3  
4  
5  
6  
7  
8  
9  
10  
11  
12  
13  
14  
15  
16  
17  
18  
19  
20  
21  
22  
23  
24  
25  
26  
27  
28  
29  
30  
31  
32  
33  
34  
35  
36  
37  
38  
39  
40  
41  
42  
43  
44  
45  
46  
47  
48  
49  
50  
51  
52  
53  
54  
55  
56  
57  
58  
59  
60



B Q T\* R

B P

B Q\* T C H P

B Q\* Q

R\*

B T C H

B Q\* Q

B T C H

B Q\* Q R

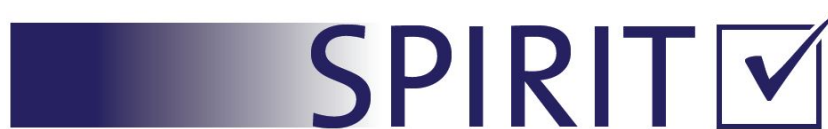

## STANDARD PROTOCOL ITEMS: RECOMMENDATIONS FOR INTERVENTIONAL TRIALS

SPIRIT 2013 Checklist: Recommended items to address in a clinical trial protocol and related documents\*

| Section/item                                              | ItemNo | Description                                                                                                                                                                                                                                                                              | Page and line number(s)                                       |
|-----------------------------------------------------------|--------|------------------------------------------------------------------------------------------------------------------------------------------------------------------------------------------------------------------------------------------------------------------------------------------|---------------------------------------------------------------|
| <b>Administrative information</b>                         |        |                                                                                                                                                                                                                                                                                          |                                                               |
| Title                                                     | 1      | Descriptive title identifying the study design, population, interventions, and, if applicable, trial acronym                                                                                                                                                                             | Page 1, line 3-5                                              |
| Trial registration                                        | 2a     | Trial identifier and registry name. If not yet registered, name of intended registry                                                                                                                                                                                                     | Page 4, line 5                                                |
|                                                           | 2b     | All items from the World Health Organization Trial Registration Data Set                                                                                                                                                                                                                 |                                                               |
| Protocol version                                          | 3      | Date and version identifier                                                                                                                                                                                                                                                              | Page 2, line 16                                               |
| Funding                                                   | 4      | Sources and types of financial, material, and other support                                                                                                                                                                                                                              | Page 2, line 17-19                                            |
| Roles and responsibilities                                | 5a     | Names, affiliations, and roles of protocol contributors                                                                                                                                                                                                                                  | Page 1, line 6-21<br>Page 2, line 1-4<br>Page 20, line 1-13   |
|                                                           | 5b     | Name and contact information for the trial sponsor                                                                                                                                                                                                                                       | Page 2, line 5-10                                             |
|                                                           | 5c     | Role of study sponsor and funders, if any, in study design; collection, management, analysis, and interpretation of data; writing of the report; and the decision to submit the report for publication, including whether they will have ultimate authority over any of these activities | Page 2, line 17-19                                            |
|                                                           | 5d     | Composition, roles, and responsibilities of the coordinating centre, steering committee, endpoint adjudication committee, data management team, and other individuals or groups overseeing the trial, if applicable (see Item 21a for data monitoring committee)                         | Page 20, line 1-13                                            |
|                                                           |        |                                                                                                                                                                                                                                                                                          |                                                               |
| <b>Introduction</b>                                       |        |                                                                                                                                                                                                                                                                                          |                                                               |
| Background and rationale                                  | 6a     | Description of research question and justification for undertaking the trial, including summary of relevant studies (published and unpublished) examining benefits and harms for each intervention                                                                                       | Page 6, line 6-25<br>Page 7, line 1-3                         |
|                                                           | 6b     | Explanation for choice of comparators                                                                                                                                                                                                                                                    | Not applicable                                                |
| Objectives                                                | 7      | Specific objectives or hypotheses                                                                                                                                                                                                                                                        | Page 7, line 4-11                                             |
| Trial design                                              | 8      | Description of trial design including type of trial (eg, parallel group, crossover, factorial, single group), allocation ratio, and framework (eg, superiority, equivalence, noninferiority, exploratory)                                                                                | Page 7, line 8-11                                             |
| <b>Methods: Participants, interventions, and outcomes</b> |        |                                                                                                                                                                                                                                                                                          |                                                               |
| Study setting                                             | 9      | Description of study settings (eg, community clinic, academic hospital) and list of countries where data will be collected. Reference to where list of study sites can be obtained                                                                                                       | Page 8, line 2-3                                              |
| Eligibility criteria                                      | 10     | Inclusion and exclusion criteria for participants. If applicable, eligibility criteria for study centres and individuals who will perform the interventions (eg, surgeons, psychotherapists)                                                                                             | Page 8, line 4-19                                             |
| Interventions                                             | 11a    | Interventions for each group with sufficient detail to allow replication, including how and when they will be administered                                                                                                                                                               | Page 8, line 20-22<br>Page 9, line 1-24<br>Page 10, line 1-25 |
|                                                           | 11b    | Criteria for discontinuing or modifying allocated interventions for a given trial participant (eg, drug dose change in response to harms, participant request, or improving/worsening disease)                                                                                           | Page 9, line 20-23<br>Page 11, line 12-15                     |

|    |                      |     |                                                                                                                                                                                                                                                                                                                                                                                |                                                                |
|----|----------------------|-----|--------------------------------------------------------------------------------------------------------------------------------------------------------------------------------------------------------------------------------------------------------------------------------------------------------------------------------------------------------------------------------|----------------------------------------------------------------|
| 1  |                      | 11c | Strategies to improve adherence to intervention protocols, and any procedures for monitoring adherence (eg, drug tablet return, laboratory tests)                                                                                                                                                                                                                              | Not applicable                                                 |
| 2  |                      |     |                                                                                                                                                                                                                                                                                                                                                                                |                                                                |
| 3  |                      |     |                                                                                                                                                                                                                                                                                                                                                                                |                                                                |
| 4  |                      | 11d | Relevant concomitant care and interventions that are permitted or prohibited during the trial                                                                                                                                                                                                                                                                                  | Not applicable                                                 |
| 5  |                      |     |                                                                                                                                                                                                                                                                                                                                                                                |                                                                |
| 6  | Outcomes             | 12  | Primary, secondary, and other outcomes, including the specific measurement variable (eg, systolic blood pressure), analysis metric (eg, change from baseline, final value, time to event), method of aggregation (eg, median, proportion), and time point for each outcome. Explanation of the clinical relevance of chosen efficacy and harm outcomes is strongly recommended | Page 12, line 13-23<br>Page 13, line 1-25<br>Page 14, line 1-5 |
| 7  |                      |     |                                                                                                                                                                                                                                                                                                                                                                                |                                                                |
| 8  |                      |     |                                                                                                                                                                                                                                                                                                                                                                                |                                                                |
| 9  |                      |     |                                                                                                                                                                                                                                                                                                                                                                                |                                                                |
| 10 | Participant timeline | 13  | Time schedule of enrolment, interventions (including any run-ins and washouts), assessments, and visits for participants. A schematic diagram is highly recommended (see Figure)                                                                                                                                                                                               | Figure 1                                                       |
| 11 |                      |     |                                                                                                                                                                                                                                                                                                                                                                                |                                                                |
| 12 |                      |     |                                                                                                                                                                                                                                                                                                                                                                                |                                                                |
| 13 | Sample size          | 14  | Estimated number of participants needed to achieve study objectives and how it was determined, including clinical and statistical assumptions supporting any sample size calculations                                                                                                                                                                                          | Page 14, line 6-11                                             |
| 14 |                      |     |                                                                                                                                                                                                                                                                                                                                                                                |                                                                |
| 15 |                      |     |                                                                                                                                                                                                                                                                                                                                                                                |                                                                |
| 16 | Recruitment          | 15  | Strategies for achieving adequate participant enrolment to reach target sample size                                                                                                                                                                                                                                                                                            | Page 14, line 12-14                                            |
| 17 |                      |     |                                                                                                                                                                                                                                                                                                                                                                                |                                                                |
| 18 |                      |     |                                                                                                                                                                                                                                                                                                                                                                                |                                                                |

#### Methods: Assignment of interventions (for controlled trials)

##### Allocation:

|    |                                  |     |                                                                                                                                                                                                                                                                                                                                                          |                |
|----|----------------------------------|-----|----------------------------------------------------------------------------------------------------------------------------------------------------------------------------------------------------------------------------------------------------------------------------------------------------------------------------------------------------------|----------------|
| 21 |                                  |     |                                                                                                                                                                                                                                                                                                                                                          |                |
| 22 | Sequence generation              | 16a | Method of generating the allocation sequence (eg, computer-generated random numbers), and list of any factors for stratification. To reduce predictability of a random sequence, details of any planned restriction (eg, blocking) should be provided in a separate document that is unavailable to those who enrol participants or assign interventions | Not applicable |
| 23 |                                  |     |                                                                                                                                                                                                                                                                                                                                                          |                |
| 24 |                                  |     |                                                                                                                                                                                                                                                                                                                                                          |                |
| 25 |                                  |     |                                                                                                                                                                                                                                                                                                                                                          |                |
| 26 |                                  |     |                                                                                                                                                                                                                                                                                                                                                          |                |
| 27 | Allocation concealment mechanism | 16b | Mechanism of implementing the allocation sequence (eg, central telephone; sequentially numbered, opaque, sealed envelopes), describing any steps to conceal the sequence until interventions are assigned                                                                                                                                                | Not applicable |
| 28 |                                  |     |                                                                                                                                                                                                                                                                                                                                                          |                |
| 29 |                                  |     |                                                                                                                                                                                                                                                                                                                                                          |                |
| 30 | Implementation                   | 16c | Who will generate the allocation sequence, who will enrol participants, and who will assign participants to interventions                                                                                                                                                                                                                                | Not applicable |
| 31 |                                  |     |                                                                                                                                                                                                                                                                                                                                                          |                |
| 32 | Blinding (masking)               | 17a | Who will be blinded after assignment to interventions (eg, trial participants, care providers, outcome assessors, data analysts), and how                                                                                                                                                                                                                | Not applicable |
| 33 |                                  |     |                                                                                                                                                                                                                                                                                                                                                          |                |
| 34 |                                  | 17b | If blinded, circumstances under which unblinding is permissible, and procedure for revealing a participant's allocated intervention during the trial                                                                                                                                                                                                     | Not applicable |
| 35 |                                  |     |                                                                                                                                                                                                                                                                                                                                                          |                |
| 36 |                                  |     |                                                                                                                                                                                                                                                                                                                                                          |                |

#### Methods: Data collection, management, and analysis

|    |                         |     |                                                                                                                                                                                                                                                                                                                                                                                                              |                                          |
|----|-------------------------|-----|--------------------------------------------------------------------------------------------------------------------------------------------------------------------------------------------------------------------------------------------------------------------------------------------------------------------------------------------------------------------------------------------------------------|------------------------------------------|
| 37 |                         |     |                                                                                                                                                                                                                                                                                                                                                                                                              |                                          |
| 38 | Data collection methods | 18a | Plans for assessment and collection of outcome, baseline, and other trial data, including any related processes to promote data quality (eg, duplicate measurements, training of assessors) and a description of study instruments (eg, questionnaires, laboratory tests) along with their reliability and validity, if known. Reference to where data collection forms can be found, if not in the protocol | Page 14, line 15-20                      |
| 39 |                         |     |                                                                                                                                                                                                                                                                                                                                                                                                              |                                          |
| 40 |                         |     |                                                                                                                                                                                                                                                                                                                                                                                                              |                                          |
| 41 |                         |     |                                                                                                                                                                                                                                                                                                                                                                                                              |                                          |
| 42 |                         |     |                                                                                                                                                                                                                                                                                                                                                                                                              |                                          |
| 43 |                         |     |                                                                                                                                                                                                                                                                                                                                                                                                              |                                          |
| 44 |                         | 18b | Plans to promote participant retention and complete follow-up, including list of any outcome data to be collected for participants who discontinue or deviate from intervention protocols                                                                                                                                                                                                                    | Page 14, line 15-20                      |
| 45 |                         |     |                                                                                                                                                                                                                                                                                                                                                                                                              |                                          |
| 46 | Data management         | 19  | Plans for data entry, coding, security, and storage, including any related processes to promote data quality (eg, double data entry; range checks for data values). Reference to where details of data management procedures can be found, if not in the protocol                                                                                                                                            | Page 14, line 15-20                      |
| 47 |                         |     |                                                                                                                                                                                                                                                                                                                                                                                                              |                                          |
| 48 |                         |     |                                                                                                                                                                                                                                                                                                                                                                                                              |                                          |
| 49 |                         |     |                                                                                                                                                                                                                                                                                                                                                                                                              |                                          |
| 50 | Statistical methods     | 20a | Statistical methods for analysing primary and secondary outcomes. Reference to where other details of the statistical analysis plan can be found, if not in the protocol                                                                                                                                                                                                                                     | Page 14, line 21-24<br>Page 15, line 1-2 |
| 51 |                         |     |                                                                                                                                                                                                                                                                                                                                                                                                              |                                          |
| 52 |                         |     |                                                                                                                                                                                                                                                                                                                                                                                                              |                                          |
| 53 |                         | 20b | Methods for any additional analyses (eg, subgroup and adjusted analyses)                                                                                                                                                                                                                                                                                                                                     | Page 14, line 21-24<br>Page 15, line 1-2 |
| 54 |                         |     |                                                                                                                                                                                                                                                                                                                                                                                                              |                                          |
| 55 |                         |     |                                                                                                                                                                                                                                                                                                                                                                                                              |                                          |
| 56 |                         | 20c | Definition of analysis population relating to protocol non-adherence (eg, as randomised analysis), and any statistical methods to handle missing data (eg, multiple imputation)                                                                                                                                                                                                                              | Page 14, line 21-24<br>Page 15, line 1-2 |
| 57 |                         |     |                                                                                                                                                                                                                                                                                                                                                                                                              |                                          |
| 58 |                         |     |                                                                                                                                                                                                                                                                                                                                                                                                              |                                          |

#### Methods: Monitoring



|    |                                 |     |                                                                                                                                                                                                                                                                                                                                       |                                       |
|----|---------------------------------|-----|---------------------------------------------------------------------------------------------------------------------------------------------------------------------------------------------------------------------------------------------------------------------------------------------------------------------------------------|---------------------------------------|
| 1  | Data monitoring                 | 21a | Composition of data monitoring committee (DMC); summary of its role and reporting structure; statement of whether it is independent from the sponsor and competing interests; and reference to where further details about its charter can be found, if not in the protocol. Alternatively, an explanation of why a DMC is not needed | Page 15, line 3-11                    |
| 2  |                                 |     |                                                                                                                                                                                                                                                                                                                                       |                                       |
| 3  |                                 |     |                                                                                                                                                                                                                                                                                                                                       |                                       |
| 4  |                                 |     |                                                                                                                                                                                                                                                                                                                                       |                                       |
| 5  |                                 |     |                                                                                                                                                                                                                                                                                                                                       |                                       |
| 6  |                                 | 21b | Description of any interim analyses and stopping guidelines, including who will have access to these interim results and make the final decision to terminate the trial                                                                                                                                                               | Page 15, line 3-11                    |
| 7  |                                 |     |                                                                                                                                                                                                                                                                                                                                       |                                       |
| 8  |                                 |     |                                                                                                                                                                                                                                                                                                                                       |                                       |
| 9  | Harms                           | 22  | Plans for collecting, assessing, reporting, and managing solicited and spontaneously reported adverse events and other unintended effects of trial interventions or trial conduct                                                                                                                                                     | Page 15, line 12-17                   |
| 10 |                                 |     |                                                                                                                                                                                                                                                                                                                                       |                                       |
| 11 |                                 |     |                                                                                                                                                                                                                                                                                                                                       |                                       |
| 12 | Auditing                        | 23  | Frequency and procedures for auditing trial conduct, if any, and whether the process will be independent from investigators and the sponsor                                                                                                                                                                                           | Page 15, line 18-24                   |
| 13 |                                 |     |                                                                                                                                                                                                                                                                                                                                       |                                       |
| 14 |                                 |     |                                                                                                                                                                                                                                                                                                                                       |                                       |
| 15 | <b>Ethics and dissemination</b> |     |                                                                                                                                                                                                                                                                                                                                       |                                       |
| 16 | Research ethics approval        | 24  | Plans for seeking research ethics committee/institutional review board (REC/IRB) approval                                                                                                                                                                                                                                             | Page 16, line 5-7                     |
| 17 |                                 |     |                                                                                                                                                                                                                                                                                                                                       |                                       |
| 18 | Protocol amendments             | 25  | Plans for communicating important protocol modifications (eg, changes to eligibility criteria, outcomes, analyses) to relevant parties (eg, investigators, REC/IRBs, trial participants, trial registries, journals, regulators)                                                                                                      | Page 16, line 8-12                    |
| 19 |                                 |     |                                                                                                                                                                                                                                                                                                                                       |                                       |
| 20 |                                 |     |                                                                                                                                                                                                                                                                                                                                       |                                       |
| 21 | Consent or assent               | 26a | Who will obtain informed consent or assent from potential trial participants or authorised surrogates, and how (see Item 32)                                                                                                                                                                                                          | Page 16, line 13-15                   |
| 22 |                                 |     |                                                                                                                                                                                                                                                                                                                                       |                                       |
| 23 |                                 |     |                                                                                                                                                                                                                                                                                                                                       |                                       |
| 24 |                                 | 26b | Additional consent provisions for collection and use of participant data and biological specimens in ancillary studies, if applicable                                                                                                                                                                                                 | Page 16, line 13-15                   |
| 25 |                                 |     |                                                                                                                                                                                                                                                                                                                                       |                                       |
| 26 | Confidentiality                 | 27  | How personal information about potential and enrolled participants will be collected, shared, and maintained in order to protect confidentiality before, during, and after the trial                                                                                                                                                  | Page 16, line 16-17                   |
| 27 |                                 |     |                                                                                                                                                                                                                                                                                                                                       |                                       |
| 28 |                                 |     |                                                                                                                                                                                                                                                                                                                                       |                                       |
| 29 | Declaration of interests        | 28  | Financial and other competing interests for principal investigators for the overall trial and each study site                                                                                                                                                                                                                         | Page 2, line 14-15                    |
| 30 |                                 |     |                                                                                                                                                                                                                                                                                                                                       |                                       |
| 31 | Access to data                  | 29  | Statement of who will have access to the final trial dataset, and disclosure of contractual agreements that limit such access for investigators                                                                                                                                                                                       | Page 16, line 18-19                   |
| 32 |                                 |     |                                                                                                                                                                                                                                                                                                                                       |                                       |
| 33 | Ancillary and post-trial care   | 30  | Provisions, if any, for ancillary and post-trial care, and for compensation to those who suffer harm from trial participation                                                                                                                                                                                                         | Page 16, line 20<br>Page 17, line 1-3 |
| 34 |                                 |     |                                                                                                                                                                                                                                                                                                                                       |                                       |
| 35 | Dissemination policy            | 31a | Plans for investigators and sponsor to communicate trial results to participants, healthcare professionals, the public, and other relevant groups (eg, via publication, reporting in results databases, or other data sharing arrangements), including any publication restrictions                                                   | Page 17, line 4-10                    |
| 36 |                                 |     |                                                                                                                                                                                                                                                                                                                                       |                                       |
| 37 |                                 |     |                                                                                                                                                                                                                                                                                                                                       |                                       |
| 38 |                                 |     |                                                                                                                                                                                                                                                                                                                                       |                                       |
| 39 |                                 | 31b | Authorship eligibility guidelines and any intended use of professional writers                                                                                                                                                                                                                                                        | Page 17, line 7                       |
| 40 |                                 |     |                                                                                                                                                                                                                                                                                                                                       |                                       |
| 41 |                                 | 31c | Plans, if any, for granting public access to the full protocol, participant-level dataset, and statistical code                                                                                                                                                                                                                       | Page 17, line 8-10                    |
| 42 |                                 |     |                                                                                                                                                                                                                                                                                                                                       |                                       |
| 43 |                                 |     |                                                                                                                                                                                                                                                                                                                                       |                                       |
| 44 | <b>Appendices</b>               |     |                                                                                                                                                                                                                                                                                                                                       |                                       |
| 45 | Informed consent materials      | 32  | Model consent form and other related documentation given to participants and authorised surrogates                                                                                                                                                                                                                                    | Not applicable                        |
| 46 |                                 |     |                                                                                                                                                                                                                                                                                                                                       |                                       |
| 47 | Biological specimens            | 33  | Plans for collection, laboratory evaluation, and storage of biological specimens for genetic or molecular analysis in the current trial and for future use in ancillary studies, if applicable                                                                                                                                        | Not applicable                        |
| 48 |                                 |     |                                                                                                                                                                                                                                                                                                                                       |                                       |
| 49 |                                 |     |                                                                                                                                                                                                                                                                                                                                       |                                       |
| 50 |                                 |     |                                                                                                                                                                                                                                                                                                                                       |                                       |

\*It is strongly recommended that this checklist be read in conjunction with the SPIRIT 2013 Explanation & Elaboration for important clarification on the items. Amendments to the protocol should be tracked and dated. The SPIRIT checklist is copyrighted by the SPIRIT Group under the Creative Commons "[Attribution-NonCommercial-NoDerivs 3.0 Unported](https://creativecommons.org/licenses/by-nc-nd/3.0/)" license.
